# Supplementary material for: Morphology and life history divergence in cave and surface populations of Gammarus lacustris (L.)
Source: PLoS One. 2018 Oct 25;13(10):e0205556. doi: 10.1371/journal.pone.0205556 (PMC6201897; doi:10.1371/journal.pone.0205556)
Supplement: S1 Table — (XLSX) [file pone.0205556.s001.xlsx]

## Sheet: Ark1
	Individual	Location	Season	Season	Sex	Body length (mm)
	351	Sandågrotta cave	H9495	Fall	F	9.6		Sex
	475	Sandågrotta cave	H9495	Fall	F	11.3		M	Male
	502	Sandågrotta cave	H9495	Fall	F	11.6		F	Female
	509	Sandågrotta cave	H9495	Fall	F	11.7		U	Immature
	525	Sandågrotta cave	H9495	Fall	F	11.9
	592	Sandågrotta cave	H9495	Fall	F	12.9
	612	Sandågrotta cave	H9495	Fall	F	13.3
	613	Sandågrotta cave	H9495	Fall	F	13.3
	619	Sandågrotta cave	H9495	Fall	F	13.5
	633	Sandågrotta cave	H9495	Fall	F	13.9
	634	Sandågrotta cave	H9495	Fall	F	13.9
	635	Sandågrotta cave	H9495	Fall	F	13.9
	638	Sandågrotta cave	H9495	Fall	F	14
	639	Sandågrotta cave	H9495	Fall	F	14
	640	Sandågrotta cave	H9495	Fall	F	14
	642	Sandågrotta cave	H9495	Fall	F	14.1
	643	Sandågrotta cave	H9495	Fall	F	14.1
	647	Sandågrotta cave	H9495	Fall	F	14.2
	655	Sandågrotta cave	H9495	Fall	F	14.3
	656	Sandågrotta cave	H9495	Fall	F	14.3
	661	Sandågrotta cave	H9495	Fall	F	14.4
	662	Sandågrotta cave	H9495	Fall	F	14.4
	665	Sandågrotta cave	H9495	Fall	F	14.5
	666	Sandågrotta cave	H9495	Fall	F	14.5
	676	Sandågrotta cave	H9495	Fall	F	14.7
	681	Sandågrotta cave	H9495	Fall	F	14.8
	688	Sandågrotta cave	H9495	Fall	F	15
	708	Sandågrotta cave	H9495	Fall	F	15.5
	713	Sandågrotta cave	H9495	Fall	F	15.6
	714	Sandågrotta cave	H9495	Fall	F	15.6
	718	Sandågrotta cave	H9495	Fall	F	15.7
	726	Sandågrotta cave	H9495	Fall	F	15.8
	731	Sandågrotta cave	H9495	Fall	F	15.9
	733	Sandågrotta cave	H9495	Fall	F	15.9
	736	Sandågrotta cave	H9495	Fall	F	16
	737	Sandågrotta cave	H9495	Fall	F	16
	738	Sandågrotta cave	H9495	Fall	F	16.1
	743	Sandågrotta cave	H9495	Fall	F	16.2
	744	Sandågrotta cave	H9495	Fall	F	16.3
	745	Sandågrotta cave	H9495	Fall	F	16.3
	761	Sandågrotta cave	H9495	Fall	F	16.8
	762	Sandågrotta cave	H9495	Fall	F	16.8
	763	Sandågrotta cave	H9495	Fall	F	16.8
	764	Sandågrotta cave	H9495	Fall	F	16.8
	765	Sandågrotta cave	H9495	Fall	F	16.8
	768	Sandågrotta cave	H9495	Fall	F	16.9
	774	Sandågrotta cave	H9495	Fall	F	17
	780	Sandågrotta cave	H9495	Fall	F	17.2
	781	Sandågrotta cave	H9495	Fall	F	17.2
	787	Sandågrotta cave	H9495	Fall	F	17.3
	796	Sandågrotta cave	H9495	Fall	F	17.7
	801	Sandågrotta cave	H9495	Fall	F	17.9
	805	Sandågrotta cave	H9495	Fall	F	18
	831	Sandågrotta cave	H9495	Fall	F	18.8
	876	Sandågrotta cave	H9495	Fall	F	20.9
	264	Sandågrotta cave	H95	Fall	F	8.7
	277	Sandågrotta cave	H95	Fall	F	8.9
	286	Sandågrotta cave	H95	Fall	F	9
	303	Sandågrotta cave	H95	Fall	F	9.1
	310	Sandågrotta cave	H95	Fall	F	9.2
	320	Sandågrotta cave	H95	Fall	F	9.3
	342	Sandågrotta cave	H95	Fall	F	9.5
	432	Sandågrotta cave	H95	Fall	F	10.8
	433	Sandågrotta cave	H95	Fall	F	10.8
	442	Sandågrotta cave	H95	Fall	F	10.9
	458	Sandågrotta cave	H95	Fall	F	11.1
	519	Sandågrotta cave	H95	Fall	F	11.8
	546	Sandågrotta cave	H95	Fall	F	12.1
	550	Sandågrotta cave	H95	Fall	F	12.2
	558	Sandågrotta cave	H95	Fall	F	12.3
	585	Sandågrotta cave	H95	Fall	F	12.8
	606	Sandågrotta cave	H95	Fall	F	13.2
	630	Sandågrotta cave	H95	Fall	F	13.8
	658	Sandågrotta cave	H95	Fall	F	14.3
	667	Sandågrotta cave	H95	Fall	F	14.5
	670	Sandågrotta cave	H95	Fall	F	14.6
	671	Sandågrotta cave	H95	Fall	F	14.6
	694	Sandågrotta cave	H95	Fall	F	15.1
	695	Sandågrotta cave	H95	Fall	F	15.1
	715	Sandågrotta cave	H95	Fall	F	15.6
	723	Sandågrotta cave	H95	Fall	F	15.7
	750	Sandågrotta cave	H95	Fall	F	16.4
	756	Sandågrotta cave	H95	Fall	F	16.5
	760	Sandågrotta cave	H95	Fall	F	16.7
	778	Sandågrotta cave	H95	Fall	F	17.1
	785	Sandågrotta cave	H95	Fall	F	17.2
	786	Sandågrotta cave	H95	Fall	F	17.2
	791	Sandågrotta cave	H95	Fall	F	17.4
	792	Sandågrotta cave	H95	Fall	F	17.4
	794	Sandågrotta cave	H95	Fall	F	17.6
	811	Sandågrotta cave	H95	Fall	F	18
	816	Sandågrotta cave	H95	Fall	F	18.1
	818	Sandågrotta cave	H95	Fall	F	18.2
	822	Sandågrotta cave	H95	Fall	F	18.3
	830	Sandågrotta cave	H95	Fall	F	18.7
	832	Sandågrotta cave	H95	Fall	F	18.8
	839	Sandågrotta cave	H95	Fall	F	19
	842	Sandågrotta cave	H95	Fall	F	19.1
	845	Sandågrotta cave	H95	Fall	F	19.2
	852	Sandågrotta cave	H95	Fall	F	19.5
	332	Sandågrotta cave	H9495	Fall	M	9.4
	409	Sandågrotta cave	H9495	Fall	M	10.5
	430	Sandågrotta cave	H9495	Fall	M	10.8
	544	Sandågrotta cave	H9495	Fall	M	12.1
	572	Sandågrotta cave	H9495	Fall	M	12.5
	605	Sandågrotta cave	H9495	Fall	M	13.2
	648	Sandågrotta cave	H9495	Fall	M	14.2
	649	Sandågrotta cave	H9495	Fall	M	14.2
	675	Sandågrotta cave	H9495	Fall	M	14.7
	680	Sandågrotta cave	H9495	Fall	M	14.8
	689	Sandågrotta cave	H9495	Fall	M	15
	697	Sandågrotta cave	H9495	Fall	M	15.2
	703	Sandågrotta cave	H9495	Fall	M	15.3
	705	Sandågrotta cave	H9495	Fall	M	15.4
	706	Sandågrotta cave	H9495	Fall	M	15.4
	709	Sandågrotta cave	H9495	Fall	M	15.5
	716	Sandågrotta cave	H9495	Fall	M	15.7
	724	Sandågrotta cave	H9495	Fall	M	15.8
	732	Sandågrotta cave	H9495	Fall	M	15.9
	739	Sandågrotta cave	H9495	Fall	M	16.1
	751	Sandågrotta cave	H9495	Fall	M	16.5
	752	Sandågrotta cave	H9495	Fall	M	16.5
	772	Sandågrotta cave	H9495	Fall	M	17
	775	Sandågrotta cave	H9495	Fall	M	17.1
	776	Sandågrotta cave	H9495	Fall	M	17.1
	782	Sandågrotta cave	H9495	Fall	M	17.2
	783	Sandågrotta cave	H9495	Fall	M	17.2
	788	Sandågrotta cave	H9495	Fall	M	17.3
	790	Sandågrotta cave	H9495	Fall	M	17.4
	793	Sandågrotta cave	H9495	Fall	M	17.6
	795	Sandågrotta cave	H9495	Fall	M	17.7
	798	Sandågrotta cave	H9495	Fall	M	17.8
	799	Sandågrotta cave	H9495	Fall	M	17.8
	802	Sandågrotta cave	H9495	Fall	M	17.9
	806	Sandågrotta cave	H9495	Fall	M	18
	807	Sandågrotta cave	H9495	Fall	M	18
	808	Sandågrotta cave	H9495	Fall	M	18
	809	Sandågrotta cave	H9495	Fall	M	18
	813	Sandågrotta cave	H9495	Fall	M	18.1
	814	Sandågrotta cave	H9495	Fall	M	18.1
	817	Sandågrotta cave	H9495	Fall	M	18.2
	819	Sandågrotta cave	H9495	Fall	M	18.3
	820	Sandågrotta cave	H9495	Fall	M	18.3
	821	Sandågrotta cave	H9495	Fall	M	18.3
	824	Sandågrotta cave	H9495	Fall	M	18.4
	835	Sandågrotta cave	H9495	Fall	M	19
	844	Sandågrotta cave	H9495	Fall	M	19.1
	847	Sandågrotta cave	H9495	Fall	M	19.3
	848	Sandågrotta cave	H9495	Fall	M	19.3
	850	Sandågrotta cave	H9495	Fall	M	19.4
	855	Sandågrotta cave	H9495	Fall	M	19.9
	857	Sandågrotta cave	H9495	Fall	M	20
	858	Sandågrotta cave	H9495	Fall	M	20
	865	Sandågrotta cave	H9495	Fall	M	20.2
	868	Sandågrotta cave	H9495	Fall	M	20.3
	872	Sandågrotta cave	H9495	Fall	M	20.7
	878	Sandågrotta cave	H9495	Fall	M	21
	879	Sandågrotta cave	H9495	Fall	M	21.1
	883	Sandågrotta cave	H9495	Fall	M	22.9
	186	Sandågrotta cave	H95	Fall	M	7.9
	228	Sandågrotta cave	H95	Fall	M	8.3
	229	Sandågrotta cave	H95	Fall	M	8.3
	230	Sandågrotta cave	H95	Fall	M	8.3
	245	Sandågrotta cave	H95	Fall	M	8.5
	287	Sandågrotta cave	H95	Fall	M	9
	304	Sandågrotta cave	H95	Fall	M	9.1
	352	Sandågrotta cave	H95	Fall	M	9.6
	426	Sandågrotta cave	H95	Fall	M	10.7
	482	Sandågrotta cave	H95	Fall	M	11.4
	511	Sandågrotta cave	H95	Fall	M	11.7
	520	Sandågrotta cave	H95	Fall	M	11.8
	597	Sandågrotta cave	H95	Fall	M	13
	618	Sandågrotta cave	H95	Fall	M	13.4
	626	Sandågrotta cave	H95	Fall	M	13.7
	627	Sandågrotta cave	H95	Fall	M	13.7
	637	Sandågrotta cave	H95	Fall	M	13.9
	651	Sandågrotta cave	H95	Fall	M	14.2
	659	Sandågrotta cave	H95	Fall	M	14.3
	663	Sandågrotta cave	H95	Fall	M	14.4
	668	Sandågrotta cave	H95	Fall	M	14.5
	672	Sandågrotta cave	H95	Fall	M	14.6
	704	Sandågrotta cave	H95	Fall	M	15.3
	707	Sandågrotta cave	H95	Fall	M	15.4
	711	Sandågrotta cave	H95	Fall	M	15.5
	712	Sandågrotta cave	H95	Fall	M	15.5
	730	Sandågrotta cave	H95	Fall	M	15.8
	779	Sandågrotta cave	H95	Fall	M	17.1
	812	Sandågrotta cave	H95	Fall	M	18
	823	Sandågrotta cave	H95	Fall	M	18.3
	826	Sandågrotta cave	H95	Fall	M	18.5
	840	Sandågrotta cave	H95	Fall	M	19
	843	Sandågrotta cave	H95	Fall	M	19.1
	846	Sandågrotta cave	H95	Fall	M	19.2
	851	Sandågrotta cave	H95	Fall	M	19.4
	860	Sandågrotta cave	H95	Fall	M	20
	861	Sandågrotta cave	H95	Fall	M	20
	864	Sandågrotta cave	H95	Fall	M	20.1
	870	Sandågrotta cave	H95	Fall	M	20.3
	871	Sandågrotta cave	H95	Fall	M	20.5
	875	Sandågrotta cave	H95	Fall	M	20.8
	880	Sandågrotta cave	H95	Fall	M	21.1
	89	Sandågrotta cave	H9495	Fall	U	5.2
	127	Sandågrotta cave	H9495	Fall	U	7
	154	Sandågrotta cave	H9495	Fall	U	7.4
	157	Sandågrotta cave	H9495	Fall	U	7.5
	179	Sandågrotta cave	H9495	Fall	U	7.8
	211	Sandågrotta cave	H9495	Fall	U	8.1
	273	Sandågrotta cave	H9495	Fall	U	8.8
	382	Sandågrotta cave	H9495	Fall	U	10.1
	687	Sandågrotta cave	H9495	Fall	U	15
	717	Sandågrotta cave	H9495	Fall	U	15.7
	725	Sandågrotta cave	H9495	Fall	U	15.8
	833	Sandågrotta cave	H9495	Fall	U	18.9
	96	Sandågrotta cave	H95	Fall	U	6
	106	Sandågrotta cave	H95	Fall	U	6.4
	116	Sandågrotta cave	H95	Fall	U	6.6
	117	Sandågrotta cave	H95	Fall	U	6.6
	119	Sandågrotta cave	H95	Fall	U	6.7
	125	Sandågrotta cave	H95	Fall	U	6.9
	147	Sandågrotta cave	H95	Fall	U	7.3
	148	Sandågrotta cave	H95	Fall	U	7.3
	149	Sandågrotta cave	H95	Fall	U	7.3
	155	Sandågrotta cave	H95	Fall	U	7.4
	156	Sandågrotta cave	H95	Fall	U	7.4
	159	Sandågrotta cave	H95	Fall	U	7.5
	160	Sandågrotta cave	H95	Fall	U	7.5
	168	Sandågrotta cave	H95	Fall	U	7.6
	187	Sandågrotta cave	H95	Fall	U	7.9
	188	Sandågrotta cave	H95	Fall	U	7.9
	189	Sandågrotta cave	H95	Fall	U	7.9
	212	Sandågrotta cave	H95	Fall	U	8.1
	213	Sandågrotta cave	H95	Fall	U	8.1
	218	Sandågrotta cave	H95	Fall	U	8.2
	219	Sandågrotta cave	H95	Fall	U	8.2
	235	Sandågrotta cave	H95	Fall	U	8.4
	246	Sandågrotta cave	H95	Fall	U	8.5
	257	Sandågrotta cave	H95	Fall	U	8.6
	258	Sandågrotta cave	H95	Fall	U	8.6
	265	Sandågrotta cave	H95	Fall	U	8.7
	343	Sandågrotta cave	H95	Fall	U	9.5
	383	Sandågrotta cave	H95	Fall	U	10.1
	276	Sandågrotta cave	VS95	Spring	F	8.9
	333	Sandågrotta cave	VS95	Spring	F	9.4
	431	Sandågrotta cave	VS95	Spring	F	10.8
	467	Sandågrotta cave	VS95	Spring	F	11.2
	503	Sandågrotta cave	VS95	Spring	F	11.6
	510	Sandågrotta cave	VS95	Spring	F	11.7
	517	Sandågrotta cave	VS95	Spring	F	11.8
	573	Sandågrotta cave	VS95	Spring	F	12.5
	582	Sandågrotta cave	VS95	Spring	F	12.7
	623	Sandågrotta cave	VS95	Spring	F	13.7
	624	Sandågrotta cave	VS95	Spring	F	13.7
	636	Sandågrotta cave	VS95	Spring	F	13.9
	644	Sandågrotta cave	VS95	Spring	F	14.1
	657	Sandågrotta cave	VS95	Spring	F	14.3
	669	Sandågrotta cave	VS95	Spring	F	14.6
	677	Sandågrotta cave	VS95	Spring	F	14.7
	683	Sandågrotta cave	VS95	Spring	F	14.8
	684	Sandågrotta cave	VS95	Spring	F	14.9
	690	Sandågrotta cave	VS95	Spring	F	15
	693	Sandågrotta cave	VS95	Spring	F	15.1
	698	Sandågrotta cave	VS95	Spring	F	15.2
	699	Sandågrotta cave	VS95	Spring	F	15.2
	710	Sandågrotta cave	VS95	Spring	F	15.5
	719	Sandågrotta cave	VS95	Spring	F	15.7
	720	Sandågrotta cave	VS95	Spring	F	15.7
	721	Sandågrotta cave	VS95	Spring	F	15.7
	722	Sandågrotta cave	VS95	Spring	F	15.7
	728	Sandågrotta cave	VS95	Spring	F	15.8
	729	Sandågrotta cave	VS95	Spring	F	15.8
	734	Sandågrotta cave	VS95	Spring	F	15.9
	740	Sandågrotta cave	VS95	Spring	F	16.1
	741	Sandågrotta cave	VS95	Spring	F	16.1
	747	Sandågrotta cave	VS95	Spring	F	16.4
	748	Sandågrotta cave	VS95	Spring	F	16.4
	753	Sandågrotta cave	VS95	Spring	F	16.5
	754	Sandågrotta cave	VS95	Spring	F	16.5
	758	Sandågrotta cave	VS95	Spring	F	16.7
	759	Sandågrotta cave	VS95	Spring	F	16.7
	766	Sandågrotta cave	VS95	Spring	F	16.8
	769	Sandågrotta cave	VS95	Spring	F	16.9
	784	Sandågrotta cave	VS95	Spring	F	17.2
	803	Sandågrotta cave	VS95	Spring	F	17.9
	815	Sandågrotta cave	VS95	Spring	F	18.1
	827	Sandågrotta cave	VS95	Spring	F	18.7
	167	Sandågrotta cave	VS95	Spring	M	7.6
	334	Sandågrotta cave	VS95	Spring	M	9.4
	410	Sandågrotta cave	VS95	Spring	M	10.5
	425	Sandågrotta cave	VS95	Spring	M	10.7
	446	Sandågrotta cave	VS95	Spring	M	11
	447	Sandågrotta cave	VS95	Spring	M	11
	468	Sandågrotta cave	VS95	Spring	M	11.2
	493	Sandågrotta cave	VS95	Spring	M	11.5
	518	Sandågrotta cave	VS95	Spring	M	11.8
	545	Sandågrotta cave	VS95	Spring	M	12.1
	584	Sandågrotta cave	VS95	Spring	M	12.8
	625	Sandågrotta cave	VS95	Spring	M	13.7
	629	Sandågrotta cave	VS95	Spring	M	13.8
	650	Sandågrotta cave	VS95	Spring	M	14.2
	678	Sandågrotta cave	VS95	Spring	M	14.7
	682	Sandågrotta cave	VS95	Spring	M	14.8
	685	Sandågrotta cave	VS95	Spring	M	14.9
	691	Sandågrotta cave	VS95	Spring	M	15
	700	Sandågrotta cave	VS95	Spring	M	15.2
	727	Sandågrotta cave	VS95	Spring	M	15.8
	742	Sandågrotta cave	VS95	Spring	M	16.1
	746	Sandågrotta cave	VS95	Spring	M	16.3
	749	Sandågrotta cave	VS95	Spring	M	16.4
	755	Sandågrotta cave	VS95	Spring	M	16.5
	757	Sandågrotta cave	VS95	Spring	M	16.6
	767	Sandågrotta cave	VS95	Spring	M	16.8
	770	Sandågrotta cave	VS95	Spring	M	16.9
	771	Sandågrotta cave	VS95	Spring	M	16.9
	773	Sandågrotta cave	VS95	Spring	M	17
	777	Sandågrotta cave	VS95	Spring	M	17.1
	789	Sandågrotta cave	VS95	Spring	M	17.3
	797	Sandågrotta cave	VS95	Spring	M	17.7
	800	Sandågrotta cave	VS95	Spring	M	17.8
	804	Sandågrotta cave	VS95	Spring	M	17.9
	810	Sandågrotta cave	VS95	Spring	M	18
	825	Sandågrotta cave	VS95	Spring	M	18.4
	828	Sandågrotta cave	VS95	Spring	M	18.7
	829	Sandågrotta cave	VS95	Spring	M	18.7
	834	Sandågrotta cave	VS95	Spring	M	18.9
	836	Sandågrotta cave	VS95	Spring	M	19
	837	Sandågrotta cave	VS95	Spring	M	19
	838	Sandågrotta cave	VS95	Spring	M	19
	841	Sandågrotta cave	VS95	Spring	M	19.1
	849	Sandågrotta cave	VS95	Spring	M	19.3
	853	Sandågrotta cave	VS95	Spring	M	19.6
	854	Sandågrotta cave	VS95	Spring	M	19.7
	856	Sandågrotta cave	VS95	Spring	M	19.9
	859	Sandågrotta cave	VS95	Spring	M	20
	862	Sandågrotta cave	VS95	Spring	M	20.1
	863	Sandågrotta cave	VS95	Spring	M	20.1
	866	Sandågrotta cave	VS95	Spring	M	20.2
	867	Sandågrotta cave	VS95	Spring	M	20.2
	869	Sandågrotta cave	VS95	Spring	M	20.3
	873	Sandågrotta cave	VS95	Spring	M	20.7
	874	Sandågrotta cave	VS95	Spring	M	20.7
	877	Sandågrotta cave	VS95	Spring	M	20.9
	881	Sandågrotta cave	VS95	Spring	M	21.3
	882	Sandågrotta cave	VS95	Spring	M	22.2
	102	Sandågrotta cave	VS95	Spring	U	6.3
	113	Sandågrotta cave	VS95	Spring	U	6.5
	114	Sandågrotta cave	VS95	Spring	U	6.5
	115	Sandågrotta cave	VS95	Spring	U	6.6
	118	Sandågrotta cave	VS95	Spring	U	6.7
	123	Sandågrotta cave	VS95	Spring	U	6.8
	124	Sandågrotta cave	VS95	Spring	U	6.9
	128	Sandågrotta cave	VS95	Spring	U	7
	134	Sandågrotta cave	VS95	Spring	U	7.1
	158	Sandågrotta cave	VS95	Spring	U	7.5
	199	Sandågrotta cave	VS95	Spring	U	8
	476	Sandågrotta cave	VS95	Spring	U	11.3
	641	Sandågrotta cave	VS95	Spring	U	14
	150	Lake Lille Lauarvann	H9495	Fall	F	7.3
	161	Lake Lille Lauarvann	H9495	Fall	F	7.5
	162	Lake Lille Lauarvann	H9495	Fall	F	7.5
	171	Lake Lille Lauarvann	H9495	Fall	F	7.7
	172	Lake Lille Lauarvann	H9495	Fall	F	7.7
	190	Lake Lille Lauarvann	H9495	Fall	F	7.9
	192	Lake Lille Lauarvann	H9495	Fall	F	7.9
	193	Lake Lille Lauarvann	H9495	Fall	F	7.9
	200	Lake Lille Lauarvann	H9495	Fall	F	8
	202	Lake Lille Lauarvann	H9495	Fall	F	8
	214	Lake Lille Lauarvann	H9495	Fall	F	8.1
	216	Lake Lille Lauarvann	H9495	Fall	F	8.1
	220	Lake Lille Lauarvann	H9495	Fall	F	8.2
	221	Lake Lille Lauarvann	H9495	Fall	F	8.2
	222	Lake Lille Lauarvann	H9495	Fall	F	8.2
	223	Lake Lille Lauarvann	H9495	Fall	F	8.2
	231	Lake Lille Lauarvann	H9495	Fall	F	8.3
	232	Lake Lille Lauarvann	H9495	Fall	F	8.3
	233	Lake Lille Lauarvann	H9495	Fall	F	8.3
	234	Lake Lille Lauarvann	H9495	Fall	F	8.3
	236	Lake Lille Lauarvann	H9495	Fall	F	8.4
	237	Lake Lille Lauarvann	H9495	Fall	F	8.4
	238	Lake Lille Lauarvann	H9495	Fall	F	8.4
	241	Lake Lille Lauarvann	H9495	Fall	F	8.4
	247	Lake Lille Lauarvann	H9495	Fall	F	8.5
	248	Lake Lille Lauarvann	H9495	Fall	F	8.5
	249	Lake Lille Lauarvann	H9495	Fall	F	8.5
	250	Lake Lille Lauarvann	H9495	Fall	F	8.5
	259	Lake Lille Lauarvann	H9495	Fall	F	8.6
	260	Lake Lille Lauarvann	H9495	Fall	F	8.6
	261	Lake Lille Lauarvann	H9495	Fall	F	8.6
	262	Lake Lille Lauarvann	H9495	Fall	F	8.6
	263	Lake Lille Lauarvann	H9495	Fall	F	8.6
	266	Lake Lille Lauarvann	H9495	Fall	F	8.7
	268	Lake Lille Lauarvann	H9495	Fall	F	8.7
	269	Lake Lille Lauarvann	H9495	Fall	F	8.7
	270	Lake Lille Lauarvann	H9495	Fall	F	8.7
	271	Lake Lille Lauarvann	H9495	Fall	F	8.7
	278	Lake Lille Lauarvann	H9495	Fall	F	8.9
	288	Lake Lille Lauarvann	H9495	Fall	F	9
	307	Lake Lille Lauarvann	H9495	Fall	F	9.1
	311	Lake Lille Lauarvann	H9495	Fall	F	9.2
	312	Lake Lille Lauarvann	H9495	Fall	F	9.2
	318	Lake Lille Lauarvann	H9495	Fall	F	9.2
	321	Lake Lille Lauarvann	H9495	Fall	F	9.3
	322	Lake Lille Lauarvann	H9495	Fall	F	9.3
	335	Lake Lille Lauarvann	H9495	Fall	F	9.4
	344	Lake Lille Lauarvann	H9495	Fall	F	9.5
	347	Lake Lille Lauarvann	H9495	Fall	F	9.5
	363	Lake Lille Lauarvann	H9495	Fall	F	9.8
	366	Lake Lille Lauarvann	H9495	Fall	F	9.9
	376	Lake Lille Lauarvann	H9495	Fall	F	10
	397	Lake Lille Lauarvann	H9495	Fall	F	10.3
	402	Lake Lille Lauarvann	H9495	Fall	F	10.4
	421	Lake Lille Lauarvann	H9495	Fall	F	10.6
	435	Lake Lille Lauarvann	H9495	Fall	F	10.8
	459	Lake Lille Lauarvann	H9495	Fall	F	11.1
	484	Lake Lille Lauarvann	H9495	Fall	F	11.4
	485	Lake Lille Lauarvann	H9495	Fall	F	11.4
	494	Lake Lille Lauarvann	H9495	Fall	F	11.5
	504	Lake Lille Lauarvann	H9495	Fall	F	11.6
	505	Lake Lille Lauarvann	H9495	Fall	F	11.6
	522	Lake Lille Lauarvann	H9495	Fall	F	11.8
	532	Lake Lille Lauarvann	H9495	Fall	F	12
	535	Lake Lille Lauarvann	H9495	Fall	F	12
	547	Lake Lille Lauarvann	H9495	Fall	F	12.1
	559	Lake Lille Lauarvann	H9495	Fall	F	12.3
	568	Lake Lille Lauarvann	H9495	Fall	F	12.4
	598	Lake Lille Lauarvann	H9495	Fall	F	13
	614	Lake Lille Lauarvann	H9495	Fall	F	13.3
	673	Lake Lille Lauarvann	H9495	Fall	F	14.6
	139	Lake Lille Lauarvann	H95	Fall	F	7.2
	163	Lake Lille Lauarvann	H95	Fall	F	7.5
	166	Lake Lille Lauarvann	H95	Fall	F	7.5
	169	Lake Lille Lauarvann	H95	Fall	F	7.6
	173	Lake Lille Lauarvann	H95	Fall	F	7.7
	176	Lake Lille Lauarvann	H95	Fall	F	7.7
	185	Lake Lille Lauarvann	H95	Fall	F	7.8
	198	Lake Lille Lauarvann	H95	Fall	F	7.9
	208	Lake Lille Lauarvann	H95	Fall	F	8
	226	Lake Lille Lauarvann	H95	Fall	F	8.2
	227	Lake Lille Lauarvann	H95	Fall	F	8.2
	243	Lake Lille Lauarvann	H95	Fall	F	8.4
	244	Lake Lille Lauarvann	H95	Fall	F	8.4
	256	Lake Lille Lauarvann	H95	Fall	F	8.5
	282	Lake Lille Lauarvann	H95	Fall	F	8.9
	283	Lake Lille Lauarvann	H95	Fall	F	8.9
	297	Lake Lille Lauarvann	H95	Fall	F	9
	298	Lake Lille Lauarvann	H95	Fall	F	9
	300	Lake Lille Lauarvann	H95	Fall	F	9
	309	Lake Lille Lauarvann	H95	Fall	F	9.1
	326	Lake Lille Lauarvann	H95	Fall	F	9.3
	329	Lake Lille Lauarvann	H95	Fall	F	9.3
	330	Lake Lille Lauarvann	H95	Fall	F	9.3
	337	Lake Lille Lauarvann	H95	Fall	F	9.4
	338	Lake Lille Lauarvann	H95	Fall	F	9.4
	339	Lake Lille Lauarvann	H95	Fall	F	9.4
	349	Lake Lille Lauarvann	H95	Fall	F	9.5
	350	Lake Lille Lauarvann	H95	Fall	F	9.5
	355	Lake Lille Lauarvann	H95	Fall	F	9.6
	360	Lake Lille Lauarvann	H95	Fall	F	9.7
	365	Lake Lille Lauarvann	H95	Fall	F	9.8
	368	Lake Lille Lauarvann	H95	Fall	F	9.9
	369	Lake Lille Lauarvann	H95	Fall	F	9.9
	380	Lake Lille Lauarvann	H95	Fall	F	10
	381	Lake Lille Lauarvann	H95	Fall	F	10
	387	Lake Lille Lauarvann	H95	Fall	F	10.1
	394	Lake Lille Lauarvann	H95	Fall	F	10.2
	399	Lake Lille Lauarvann	H95	Fall	F	10.3
	400	Lake Lille Lauarvann	H95	Fall	F	10.3
	401	Lake Lille Lauarvann	H95	Fall	F	10.3
	403	Lake Lille Lauarvann	H95	Fall	F	10.4
	405	Lake Lille Lauarvann	H95	Fall	F	10.4
	415	Lake Lille Lauarvann	H95	Fall	F	10.5
	416	Lake Lille Lauarvann	H95	Fall	F	10.5
	417	Lake Lille Lauarvann	H95	Fall	F	10.5
	422	Lake Lille Lauarvann	H95	Fall	F	10.6
	429	Lake Lille Lauarvann	H95	Fall	F	10.7
	438	Lake Lille Lauarvann	H95	Fall	F	10.8
	439	Lake Lille Lauarvann	H95	Fall	F	10.8
	451	Lake Lille Lauarvann	H95	Fall	F	11
	452	Lake Lille Lauarvann	H95	Fall	F	11
	453	Lake Lille Lauarvann	H95	Fall	F	11
	462	Lake Lille Lauarvann	H95	Fall	F	11.1
	464	Lake Lille Lauarvann	H95	Fall	F	11.1
	473	Lake Lille Lauarvann	H95	Fall	F	11.2
	480	Lake Lille Lauarvann	H95	Fall	F	11.3
	491	Lake Lille Lauarvann	H95	Fall	F	11.4
	492	Lake Lille Lauarvann	H95	Fall	F	11.4
	499	Lake Lille Lauarvann	H95	Fall	F	11.5
	500	Lake Lille Lauarvann	H95	Fall	F	11.5
	501	Lake Lille Lauarvann	H95	Fall	F	11.5
	516	Lake Lille Lauarvann	H95	Fall	F	11.7
	523	Lake Lille Lauarvann	H95	Fall	F	11.8
	524	Lake Lille Lauarvann	H95	Fall	F	11.8
	537	Lake Lille Lauarvann	H95	Fall	F	12
	538	Lake Lille Lauarvann	H95	Fall	F	12
	540	Lake Lille Lauarvann	H95	Fall	F	12
	541	Lake Lille Lauarvann	H95	Fall	F	12
	552	Lake Lille Lauarvann	H95	Fall	F	12.2
	553	Lake Lille Lauarvann	H95	Fall	F	12.2
	554	Lake Lille Lauarvann	H95	Fall	F	12.2
	555	Lake Lille Lauarvann	H95	Fall	F	12.2
	556	Lake Lille Lauarvann	H95	Fall	F	12.2
	557	Lake Lille Lauarvann	H95	Fall	F	12.2
	564	Lake Lille Lauarvann	H95	Fall	F	12.3
	565	Lake Lille Lauarvann	H95	Fall	F	12.3
	566	Lake Lille Lauarvann	H95	Fall	F	12.3
	567	Lake Lille Lauarvann	H95	Fall	F	12.3
	570	Lake Lille Lauarvann	H95	Fall	F	12.4
	577	Lake Lille Lauarvann	H95	Fall	F	12.5
	580	Lake Lille Lauarvann	H95	Fall	F	12.6
	581	Lake Lille Lauarvann	H95	Fall	F	12.6
	590	Lake Lille Lauarvann	H95	Fall	F	12.8
	591	Lake Lille Lauarvann	H95	Fall	F	12.8
	601	Lake Lille Lauarvann	H95	Fall	F	13
	611	Lake Lille Lauarvann	H95	Fall	F	13.2
	617	Lake Lille Lauarvann	H95	Fall	F	13.3
	620	Lake Lille Lauarvann	H95	Fall	F	13.5
	621	Lake Lille Lauarvann	H95	Fall	F	13.5
	622	Lake Lille Lauarvann	H95	Fall	F	13.5
	628	Lake Lille Lauarvann	H95	Fall	F	13.7
	100	Lake Lille Lauarvann	H9495	Fall	M	6.2
	129	Lake Lille Lauarvann	H9495	Fall	M	7
	191	Lake Lille Lauarvann	H9495	Fall	M	7.9
	215	Lake Lille Lauarvann	H9495	Fall	M	8.1
	251	Lake Lille Lauarvann	H9495	Fall	M	8.5
	267	Lake Lille Lauarvann	H9495	Fall	M	8.7
	279	Lake Lille Lauarvann	H9495	Fall	M	8.9
	280	Lake Lille Lauarvann	H9495	Fall	M	8.9
	289	Lake Lille Lauarvann	H9495	Fall	M	9
	290	Lake Lille Lauarvann	H9495	Fall	M	9
	293	Lake Lille Lauarvann	H9495	Fall	M	9
	294	Lake Lille Lauarvann	H9495	Fall	M	9
	295	Lake Lille Lauarvann	H9495	Fall	M	9
	296	Lake Lille Lauarvann	H9495	Fall	M	9
	305	Lake Lille Lauarvann	H9495	Fall	M	9.1
	306	Lake Lille Lauarvann	H9495	Fall	M	9.1
	313	Lake Lille Lauarvann	H9495	Fall	M	9.2
	314	Lake Lille Lauarvann	H9495	Fall	M	9.2
	323	Lake Lille Lauarvann	H9495	Fall	M	9.3
	324	Lake Lille Lauarvann	H9495	Fall	M	9.3
	345	Lake Lille Lauarvann	H9495	Fall	M	9.5
	353	Lake Lille Lauarvann	H9495	Fall	M	9.6
	354	Lake Lille Lauarvann	H9495	Fall	M	9.6
	357	Lake Lille Lauarvann	H9495	Fall	M	9.7
	358	Lake Lille Lauarvann	H9495	Fall	M	9.7
	361	Lake Lille Lauarvann	H9495	Fall	M	9.8
	362	Lake Lille Lauarvann	H9495	Fall	M	9.8
	372	Lake Lille Lauarvann	H9495	Fall	M	10
	373	Lake Lille Lauarvann	H9495	Fall	M	10
	374	Lake Lille Lauarvann	H9495	Fall	M	10
	375	Lake Lille Lauarvann	H9495	Fall	M	10
	377	Lake Lille Lauarvann	H9495	Fall	M	10
	378	Lake Lille Lauarvann	H9495	Fall	M	10
	384	Lake Lille Lauarvann	H9495	Fall	M	10.1
	385	Lake Lille Lauarvann	H9495	Fall	M	10.1
	389	Lake Lille Lauarvann	H9495	Fall	M	10.2
	390	Lake Lille Lauarvann	H9495	Fall	M	10.2
	411	Lake Lille Lauarvann	H9495	Fall	M	10.5
	412	Lake Lille Lauarvann	H9495	Fall	M	10.5
	420	Lake Lille Lauarvann	H9495	Fall	M	10.6
	427	Lake Lille Lauarvann	H9495	Fall	M	10.7
	434	Lake Lille Lauarvann	H9495	Fall	M	10.8
	443	Lake Lille Lauarvann	H9495	Fall	M	10.9
	448	Lake Lille Lauarvann	H9495	Fall	M	11
	460	Lake Lille Lauarvann	H9495	Fall	M	11.1
	461	Lake Lille Lauarvann	H9495	Fall	M	11.1
	469	Lake Lille Lauarvann	H9495	Fall	M	11.2
	477	Lake Lille Lauarvann	H9495	Fall	M	11.3
	483	Lake Lille Lauarvann	H9495	Fall	M	11.4
	495	Lake Lille Lauarvann	H9495	Fall	M	11.5
	512	Lake Lille Lauarvann	H9495	Fall	M	11.7
	513	Lake Lille Lauarvann	H9495	Fall	M	11.7
	521	Lake Lille Lauarvann	H9495	Fall	M	11.8
	533	Lake Lille Lauarvann	H9495	Fall	M	12
	534	Lake Lille Lauarvann	H9495	Fall	M	12
	548	Lake Lille Lauarvann	H9495	Fall	M	12.1
	586	Lake Lille Lauarvann	H9495	Fall	M	12.8
	593	Lake Lille Lauarvann	H9495	Fall	M	12.9
	607	Lake Lille Lauarvann	H9495	Fall	M	13.2
	645	Lake Lille Lauarvann	H9495	Fall	M	14.1
	652	Lake Lille Lauarvann	H9495	Fall	M	14.2
	679	Lake Lille Lauarvann	H9495	Fall	M	14.7
	696	Lake Lille Lauarvann	H9495	Fall	M	15.1
	701	Lake Lille Lauarvann	H9495	Fall	M	15.2
	107	Lake Lille Lauarvann	H95	Fall	M	6.4
	120	Lake Lille Lauarvann	H95	Fall	M	6.7
	130	Lake Lille Lauarvann	H95	Fall	M	7
	133	Lake Lille Lauarvann	H95	Fall	M	7
	146	Lake Lille Lauarvann	H95	Fall	M	7.2
	164	Lake Lille Lauarvann	H95	Fall	M	7.5
	174	Lake Lille Lauarvann	H95	Fall	M	7.7
	177	Lake Lille Lauarvann	H95	Fall	M	7.7
	180	Lake Lille Lauarvann	H95	Fall	M	7.8
	181	Lake Lille Lauarvann	H95	Fall	M	7.8
	204	Lake Lille Lauarvann	H95	Fall	M	8
	205	Lake Lille Lauarvann	H95	Fall	M	8
	210	Lake Lille Lauarvann	H95	Fall	M	8
	242	Lake Lille Lauarvann	H95	Fall	M	8.4
	252	Lake Lille Lauarvann	H95	Fall	M	8.5
	253	Lake Lille Lauarvann	H95	Fall	M	8.5
	254	Lake Lille Lauarvann	H95	Fall	M	8.5
	274	Lake Lille Lauarvann	H95	Fall	M	8.8
	275	Lake Lille Lauarvann	H95	Fall	M	8.8
	281	Lake Lille Lauarvann	H95	Fall	M	8.9
	299	Lake Lille Lauarvann	H95	Fall	M	9
	301	Lake Lille Lauarvann	H95	Fall	M	9
	302	Lake Lille Lauarvann	H95	Fall	M	9
	319	Lake Lille Lauarvann	H95	Fall	M	9.2
	327	Lake Lille Lauarvann	H95	Fall	M	9.3
	328	Lake Lille Lauarvann	H95	Fall	M	9.3
	331	Lake Lille Lauarvann	H95	Fall	M	9.3
	340	Lake Lille Lauarvann	H95	Fall	M	9.4
	341	Lake Lille Lauarvann	H95	Fall	M	9.4
	356	Lake Lille Lauarvann	H95	Fall	M	9.6
	370	Lake Lille Lauarvann	H95	Fall	M	9.9
	371	Lake Lille Lauarvann	H95	Fall	M	9.9
	379	Lake Lille Lauarvann	H95	Fall	M	10
	388	Lake Lille Lauarvann	H95	Fall	M	10.1
	391	Lake Lille Lauarvann	H95	Fall	M	10.2
	392	Lake Lille Lauarvann	H95	Fall	M	10.2
	393	Lake Lille Lauarvann	H95	Fall	M	10.2
	395	Lake Lille Lauarvann	H95	Fall	M	10.2
	396	Lake Lille Lauarvann	H95	Fall	M	10.2
	404	Lake Lille Lauarvann	H95	Fall	M	10.4
	406	Lake Lille Lauarvann	H95	Fall	M	10.4
	407	Lake Lille Lauarvann	H95	Fall	M	10.4
	408	Lake Lille Lauarvann	H95	Fall	M	10.4
	418	Lake Lille Lauarvann	H95	Fall	M	10.5
	419	Lake Lille Lauarvann	H95	Fall	M	10.5
	423	Lake Lille Lauarvann	H95	Fall	M	10.6
	424	Lake Lille Lauarvann	H95	Fall	M	10.6
	440	Lake Lille Lauarvann	H95	Fall	M	10.8
	441	Lake Lille Lauarvann	H95	Fall	M	10.8
	444	Lake Lille Lauarvann	H95	Fall	M	10.9
	445	Lake Lille Lauarvann	H95	Fall	M	10.9
	454	Lake Lille Lauarvann	H95	Fall	M	11
	455	Lake Lille Lauarvann	H95	Fall	M	11
	456	Lake Lille Lauarvann	H95	Fall	M	11
	457	Lake Lille Lauarvann	H95	Fall	M	11
	463	Lake Lille Lauarvann	H95	Fall	M	11.1
	465	Lake Lille Lauarvann	H95	Fall	M	11.1
	466	Lake Lille Lauarvann	H95	Fall	M	11.1
	474	Lake Lille Lauarvann	H95	Fall	M	11.2
	481	Lake Lille Lauarvann	H95	Fall	M	11.3
	508	Lake Lille Lauarvann	H95	Fall	M	11.6
	531	Lake Lille Lauarvann	H95	Fall	M	11.9
	539	Lake Lille Lauarvann	H95	Fall	M	12
	542	Lake Lille Lauarvann	H95	Fall	M	12
	543	Lake Lille Lauarvann	H95	Fall	M	12
	549	Lake Lille Lauarvann	H95	Fall	M	12.1
	571	Lake Lille Lauarvann	H95	Fall	M	12.4
	578	Lake Lille Lauarvann	H95	Fall	M	12.5
	596	Lake Lille Lauarvann	H95	Fall	M	12.9
	600	Lake Lille Lauarvann	H95	Fall	M	13
	602	Lake Lille Lauarvann	H95	Fall	M	13
	632	Lake Lille Lauarvann	H95	Fall	M	13.8
	646	Lake Lille Lauarvann	H95	Fall	M	14.1
	660	Lake Lille Lauarvann	H95	Fall	M	14.3
	664	Lake Lille Lauarvann	H95	Fall	M	14.4
	674	Lake Lille Lauarvann	H95	Fall	M	14.6
	686	Lake Lille Lauarvann	H95	Fall	M	14.9
	702	Lake Lille Lauarvann	H95	Fall	M	15.2
	93	Lake Lille Lauarvann	H9495	Fall	U	5.7
	97	Lake Lille Lauarvann	H9495	Fall	U	6
	151	Lake Lille Lauarvann	H9495	Fall	U	7.3
	201	Lake Lille Lauarvann	H9495	Fall	U	8
	203	Lake Lille Lauarvann	H9495	Fall	U	8
	239	Lake Lille Lauarvann	H9495	Fall	U	8.4
	240	Lake Lille Lauarvann	H9495	Fall	U	8.4
	291	Lake Lille Lauarvann	H9495	Fall	U	9
	292	Lake Lille Lauarvann	H9495	Fall	U	9
	315	Lake Lille Lauarvann	H9495	Fall	U	9.2
	316	Lake Lille Lauarvann	H9495	Fall	U	9.2
	317	Lake Lille Lauarvann	H9495	Fall	U	9.2
	336	Lake Lille Lauarvann	H9495	Fall	U	9.4
	346	Lake Lille Lauarvann	H9495	Fall	U	9.5
	367	Lake Lille Lauarvann	H9495	Fall	U	9.9
	486	Lake Lille Lauarvann	H9495	Fall	U	11.4
	83	Lake Lille Lauarvann	H95	Fall	U	4.2
	84	Lake Lille Lauarvann	H95	Fall	U	4.6
	87	Lake Lille Lauarvann	H95	Fall	U	5
	88	Lake Lille Lauarvann	H95	Fall	U	5.1
	90	Lake Lille Lauarvann	H95	Fall	U	5.6
	91	Lake Lille Lauarvann	H95	Fall	U	5.6
	92	Lake Lille Lauarvann	H95	Fall	U	5.6
	94	Lake Lille Lauarvann	H95	Fall	U	5.7
	95	Lake Lille Lauarvann	H95	Fall	U	5.9
	98	Lake Lille Lauarvann	H95	Fall	U	6
	99	Lake Lille Lauarvann	H95	Fall	U	6
	101	Lake Lille Lauarvann	H95	Fall	U	6.2
	103	Lake Lille Lauarvann	H95	Fall	U	6.3
	104	Lake Lille Lauarvann	H95	Fall	U	6.3
	105	Lake Lille Lauarvann	H95	Fall	U	6.3
	108	Lake Lille Lauarvann	H95	Fall	U	6.4
	109	Lake Lille Lauarvann	H95	Fall	U	6.4
	110	Lake Lille Lauarvann	H95	Fall	U	6.4
	111	Lake Lille Lauarvann	H95	Fall	U	6.4
	112	Lake Lille Lauarvann	H95	Fall	U	6.4
	121	Lake Lille Lauarvann	H95	Fall	U	6.7
	122	Lake Lille Lauarvann	H95	Fall	U	6.7
	126	Lake Lille Lauarvann	H95	Fall	U	6.9
	131	Lake Lille Lauarvann	H95	Fall	U	7
	132	Lake Lille Lauarvann	H95	Fall	U	7
	135	Lake Lille Lauarvann	H95	Fall	U	7.1
	136	Lake Lille Lauarvann	H95	Fall	U	7.1
	137	Lake Lille Lauarvann	H95	Fall	U	7.1
	138	Lake Lille Lauarvann	H95	Fall	U	7.1
	140	Lake Lille Lauarvann	H95	Fall	U	7.2
	141	Lake Lille Lauarvann	H95	Fall	U	7.2
	142	Lake Lille Lauarvann	H95	Fall	U	7.2
	143	Lake Lille Lauarvann	H95	Fall	U	7.2
	144	Lake Lille Lauarvann	H95	Fall	U	7.2
	145	Lake Lille Lauarvann	H95	Fall	U	7.2
	152	Lake Lille Lauarvann	H95	Fall	U	7.3
	153	Lake Lille Lauarvann	H95	Fall	U	7.3
	165	Lake Lille Lauarvann	H95	Fall	U	7.5
	170	Lake Lille Lauarvann	H95	Fall	U	7.6
	175	Lake Lille Lauarvann	H95	Fall	U	7.7
	178	Lake Lille Lauarvann	H95	Fall	U	7.7
	182	Lake Lille Lauarvann	H95	Fall	U	7.8
	183	Lake Lille Lauarvann	H95	Fall	U	7.8
	184	Lake Lille Lauarvann	H95	Fall	U	7.8
	194	Lake Lille Lauarvann	H95	Fall	U	7.9
	195	Lake Lille Lauarvann	H95	Fall	U	7.9
	196	Lake Lille Lauarvann	H95	Fall	U	7.9
	197	Lake Lille Lauarvann	H95	Fall	U	7.9
	206	Lake Lille Lauarvann	H95	Fall	U	8
	207	Lake Lille Lauarvann	H95	Fall	U	8
	209	Lake Lille Lauarvann	H95	Fall	U	8
	217	Lake Lille Lauarvann	H95	Fall	U	8.1
	224	Lake Lille Lauarvann	H95	Fall	U	8.2
	225	Lake Lille Lauarvann	H95	Fall	U	8.2
	255	Lake Lille Lauarvann	H95	Fall	U	8.5
	272	Lake Lille Lauarvann	H95	Fall	U	8.7
	284	Lake Lille Lauarvann	H95	Fall	U	8.9
	285	Lake Lille Lauarvann	H95	Fall	U	8.9
	325	Lake Lille Lauarvann	VS95	Spring	F	9.3
	348	Lake Lille Lauarvann	VS95	Spring	F	9.5
	359	Lake Lille Lauarvann	VS95	Spring	F	9.7
	364	Lake Lille Lauarvann	VS95	Spring	F	9.8
	386	Lake Lille Lauarvann	VS95	Spring	F	10.1
	398	Lake Lille Lauarvann	VS95	Spring	F	10.3
	413	Lake Lille Lauarvann	VS95	Spring	F	10.5
	414	Lake Lille Lauarvann	VS95	Spring	F	10.5
	428	Lake Lille Lauarvann	VS95	Spring	F	10.7
	436	Lake Lille Lauarvann	VS95	Spring	F	10.8
	437	Lake Lille Lauarvann	VS95	Spring	F	10.8
	449	Lake Lille Lauarvann	VS95	Spring	F	11
	450	Lake Lille Lauarvann	VS95	Spring	F	11
	470	Lake Lille Lauarvann	VS95	Spring	F	11.2
	471	Lake Lille Lauarvann	VS95	Spring	F	11.2
	472	Lake Lille Lauarvann	VS95	Spring	F	11.2
	479	Lake Lille Lauarvann	VS95	Spring	F	11.3
	487	Lake Lille Lauarvann	VS95	Spring	F	11.4
	489	Lake Lille Lauarvann	VS95	Spring	F	11.4
	490	Lake Lille Lauarvann	VS95	Spring	F	11.4
	496	Lake Lille Lauarvann	VS95	Spring	F	11.5
	498	Lake Lille Lauarvann	VS95	Spring	F	11.5
	507	Lake Lille Lauarvann	VS95	Spring	F	11.6
	514	Lake Lille Lauarvann	VS95	Spring	F	11.7
	526	Lake Lille Lauarvann	VS95	Spring	F	11.9
	528	Lake Lille Lauarvann	VS95	Spring	F	11.9
	530	Lake Lille Lauarvann	VS95	Spring	F	11.9
	551	Lake Lille Lauarvann	VS95	Spring	F	12.2
	587	Lake Lille Lauarvann	VS95	Spring	F	12.8
	608	Lake Lille Lauarvann	VS95	Spring	F	13.2
	609	Lake Lille Lauarvann	VS95	Spring	F	13.2
	610	Lake Lille Lauarvann	VS95	Spring	F	13.2
	616	Lake Lille Lauarvann	VS95	Spring	F	13.3
	653	Lake Lille Lauarvann	VS95	Spring	F	14.2
	692	Lake Lille Lauarvann	VS95	Spring	F	15
	735	Lake Lille Lauarvann	VS95	Spring	F	15.9
	308	Lake Lille Lauarvann	VS95	Spring	M	9.1
	478	Lake Lille Lauarvann	VS95	Spring	M	11.3
	488	Lake Lille Lauarvann	VS95	Spring	M	11.4
	497	Lake Lille Lauarvann	VS95	Spring	M	11.5
	506	Lake Lille Lauarvann	VS95	Spring	M	11.6
	515	Lake Lille Lauarvann	VS95	Spring	M	11.7
	527	Lake Lille Lauarvann	VS95	Spring	M	11.9
	529	Lake Lille Lauarvann	VS95	Spring	M	11.9
	536	Lake Lille Lauarvann	VS95	Spring	M	12
	560	Lake Lille Lauarvann	VS95	Spring	M	12.3
	561	Lake Lille Lauarvann	VS95	Spring	M	12.3
	562	Lake Lille Lauarvann	VS95	Spring	M	12.3
	563	Lake Lille Lauarvann	VS95	Spring	M	12.3
	569	Lake Lille Lauarvann	VS95	Spring	M	12.4
	574	Lake Lille Lauarvann	VS95	Spring	M	12.5
	575	Lake Lille Lauarvann	VS95	Spring	M	12.5
	576	Lake Lille Lauarvann	VS95	Spring	M	12.5
	579	Lake Lille Lauarvann	VS95	Spring	M	12.6
	583	Lake Lille Lauarvann	VS95	Spring	M	12.7
	588	Lake Lille Lauarvann	VS95	Spring	M	12.8
	589	Lake Lille Lauarvann	VS95	Spring	M	12.8
	594	Lake Lille Lauarvann	VS95	Spring	M	12.9
	595	Lake Lille Lauarvann	VS95	Spring	M	12.9
	599	Lake Lille Lauarvann	VS95	Spring	M	13
	603	Lake Lille Lauarvann	VS95	Spring	M	13.1
	604	Lake Lille Lauarvann	VS95	Spring	M	13.1
	615	Lake Lille Lauarvann	VS95	Spring	M	13.3
	631	Lake Lille Lauarvann	VS95	Spring	M	13.8
	654	Lake Lille Lauarvann	VS95	Spring	M	14.2
	80	Lake Lille Lauarvann	VS95	Spring	U	3.8
	81	Lake Lille Lauarvann	VS95	Spring	U	3.9
	82	Lake Lille Lauarvann	VS95	Spring	U	4.2
	85	Lake Lille Lauarvann	VS95	Spring	U	4.7
	86	Lake Lille Lauarvann	VS95	Spring	U	4.9
	34	Lake Ulvenvann	1994-01-09	Fall	F	6.9
	38	Lake Ulvenvann	1994-01-09	Fall	F	7
	27	Lake Ulvenvann	1994-01-09	Fall	F	7.4
	36	Lake Ulvenvann	1994-01-09	Fall	F	7.4
	20	Lake Ulvenvann	1994-01-09	Fall	F	7.6
	23	Lake Ulvenvann	1994-01-09	Fall	F	7.6
	28	Lake Ulvenvann	1994-01-09	Fall	F	7.7
	18	Lake Ulvenvann	1994-01-09	Fall	F	7.8
	26	Lake Ulvenvann	1994-01-09	Fall	F	8
	37	Lake Ulvenvann	1994-01-09	Fall	F	8
	24	Lake Ulvenvann	1994-01-09	Fall	F	8.4
	31	Lake Ulvenvann	1994-01-09	Fall	F	8.4
	22	Lake Ulvenvann	1994-01-09	Fall	F	8.8
	30	Lake Ulvenvann	1994-01-09	Fall	F	8.9
	4	Lake Ulvenvann	1994-01-09	Fall	M	6
	32	Lake Ulvenvann	1994-01-09	Fall	M	6.5
	15	Lake Ulvenvann	1994-01-09	Fall	M	6.9
	14	Lake Ulvenvann	1994-01-09	Fall	M	7
	7	Lake Ulvenvann	1994-01-09	Fall	M	7.1
	13	Lake Ulvenvann	1994-01-09	Fall	M	8
	5	Lake Ulvenvann	1994-01-09	Fall	M	8.3
	12	Lake Ulvenvann	1994-01-09	Fall	M	8.6
	16	Lake Ulvenvann	1994-01-09	Fall	M	8.8
	9	Lake Ulvenvann	1994-01-09	Fall	M	8.9
	10	Lake Ulvenvann	1994-01-09	Fall	M	8.9
	29	Lake Ulvenvann	1994-01-09	Fall	M	9
	3	Lake Ulvenvann	1994-01-09	Fall	M	9.2
	19	Lake Ulvenvann	1994-01-09	Fall	M	9.2
	1	Lake Ulvenvann	1994-01-09	Fall	M	9.3
	6	Lake Ulvenvann	1994-01-09	Fall	M	9.3
	17	Lake Ulvenvann	1994-01-09	Fall	M	9.5
	25	Lake Ulvenvann	1994-01-09	Fall	U	4.9
	21	Lake Ulvenvann	1994-01-09	Fall	U	5.2
	33	Lake Ulvenvann	1994-01-09	Fall	U	5.7
	2	Lake Ulvenvann	1994-01-09	Fall	U	6.2
	8	Lake Ulvenvann	1994-01-09	Fall	U	7.8
	11	Lake Ulvenvann	1994-01-09	Fall	U	7.8
	61	Lake Ulvenvann	May-95	Spring	F	10.2
	46	Lake Ulvenvann	May-95	Spring	F	10.8
	43	Lake Ulvenvann	May-95	Spring	F	11
	64	Lake Ulvenvann	May-95	Spring	F	11.2
	56	Lake Ulvenvann	May-95	Spring	F	11.7
	50	Lake Ulvenvann	May-95	Spring	F	12
	51	Lake Ulvenvann	May-95	Spring	F	12
	48	Lake Ulvenvann	May-95	Spring	F	12.2
	63	Lake Ulvenvann	May-95	Spring	F	12.3
	54	Lake Ulvenvann	May-95	Spring	F	12.4
	41	Lake Ulvenvann	May-95	Spring	F	13.2
	60	Lake Ulvenvann	May-95	Spring	F	13.3
	62	Lake Ulvenvann	May-95	Spring	F	13.4
	39	Lake Ulvenvann	6/15/95	Spring	M	14.2
	57	Lake Ulvenvann	May-95	Spring	M	11.5
	59	Lake Ulvenvann	May-95	Spring	M	12.4
	58	Lake Ulvenvann	May-95	Spring	M	13
	44	Lake Ulvenvann	May-95	Spring	M	13.8
	53	Lake Ulvenvann	May-95	Spring	M	13.8
	45	Lake Ulvenvann	May-95	Spring	M	14
	49	Lake Ulvenvann	May-95	Spring	M	14.1
	55	Lake Ulvenvann	May-95	Spring	M	14.1
	52	Lake Ulvenvann	May-95	Spring	M	14.6
	42	Lake Ulvenvann	May-95	Spring	M	14.9
	47	Lake Ulvenvann	May-95	Spring	M	15
