# Supplementary material for: Morphology and life history divergence in cave and surface populations of Gammarus lacustris (L.)
Source: PLoS One. 2018 Oct 25;13(10):e0205556. doi: 10.1371/journal.pone.0205556 (PMC6201897; doi:10.1371/journal.pone.0205556)
Supplement: S6 Table — (XLS) [file pone.0205556.s006.xls]

## Sheet: MORFKAR4
nr	sted	ses	kj	kjtall	kr	lnkr	om	omkr	lnom	ole	olekr	obr	obrkr	oar	oarkr	lnoar	ant1	ant1kr	lnant1	ledd1	ledd1kr	lnledd1	ped11	ped11kr	ped12	ped12kr	ped13	ped13kr	peds1	peds1kr	lnpeds1	fl1	fl1kr	lnfl1	ant2	ant2kr	lnant2	ledd2	ledd2kr	lnledd2	ped21	ped21kr	ped22	ped22kr	ped23	ped23kr	peds2	peds2kr	lnpeds2
3	Ulven	H94	M	1	9.2	2.22	40.5	4.402	3.7	0.32	0.034	0.22	0.023	0.05	0.006	-2.93	4.78	0.52	1.56	21	2.283	3.04	0.77	0.084	0.55	0.06	0.31	0.034	1.63	0.177	0.49	3.15	0.342	1.15	2.69	0.292	0.99	12	1.304	2.48	0.35	0.038	0.76	0.083	0.69	0.075	1.45	0.158	0.37
5	Ulven	H94	M	1	8.3	2.12	46.5	5.602	3.84	0.3	0.036	0.21	0.025	0.05	0.006	-3.05	4.1	0.494	1.41	19	2.289	2.94	0.67	0.081	0.5	0.06	0.26	0.031	1.43	0.172	0.36	2.67	0.322	0.98	2.35	0.283	0.85	9	1.084	2.2	0.27	0.033	0.7	0.084	0.62	0.075	1.32	0.159	0.28
7	Ulven	H94	M	1	7.1	1.96	36.5	5.141	3.6	0.28	0.039	0.18	0.025	0.04	0.005	-3.28	3.14	0.442	1.14	14	1.972	2.64	0.51	0.072	0.35	0.049	0.25	0.035	1.11	0.156	0.1	2.03	0.286	0.71	1.65	0.232	0.5	7	0.986	1.95	0.21	0.03	0.5	0.07	0.43	0.061	0.93	0.131	-0.07
10	Ulven	H94	M	1	8.9	2.19	49	5.506	3.89	0.34	0.038	0.2	0.022	0.05	0.006	-2.93	4.43	0.498	1.49	20	2.247	3	0.66	0.074	0.53	0.06	0.28	0.031	1.47	0.165	0.39	2.96	0.333	1.09	2.46	0.276	0.9	9	1.011	2.2	0.26	0.029	0.72	0.081	0.67	0.075	1.39	0.156	0.33
12	Ulven	H94	M	1	8.6	2.15	42.5	4.942	3.75	0.34	0.04	0.24	0.027	0.06	0.007	-2.77	3.78	0.44	1.33	17	1.977	2.83	0.59	0.069	0.45	0.052	0.27	0.031	1.31	0.152	0.27	2.47	0.287	0.9	2.16	0.251	0.77	8	0.93	2.08	0.26	0.03	0.62	0.072	0.57	0.066	1.19	0.138	0.17
13	Ulven	H94	M	1	8	2.08	40.5	5.063	3.7	0.35	0.043	0.21	0.026	0.06	0.007	-2.87	3.54	0.443	1.26	16	2	2.77	0.57	0.071	0.44	0.055	0.27	0.034	1.28	0.16	0.25	2.26	0.283	0.82	2.01	0.251	0.7	8	1	2.08	0.21	0.026	0.65	0.081	0.54	0.068	1.19	0.149	0.17
14	Ulven	H94	M	1	7	1.95	33.5	4.786	3.51	0.28	0.039	0.18	0.026	0.04	0.006	-3.25	3.17	0.453	1.15	15	2.143	2.71	0.54	0.077	0.34	0.049	0.2	0.029	1.08	0.154	0.08	2.09	0.299	0.74	1.69	0.241	0.52	7	1	1.95	0.22	0.031	0.49	0.07	0.44	0.063	0.93	0.133	-0.07
15	Ulven	H94	M	1	6.9	1.93	30.5	4.42	3.42	0.26	0.037	0.19	0.027	0.04	0.005	-3.3	3.22	0.467	1.17	15	2.174	2.71	0.42	0.061	0.4	0.058	0.24	0.035	1.06	0.154	0.06	2.16	0.313	0.77	1.75	0.254	0.56	7	1.014	1.95	0.2	0.029	0.5	0.072	0.47	0.068	0.97	0.141	-0.03
16	Ulven	H94	M	1	8.8	2.17	36.5	4.148	3.6	0.33	0.038	0.22	0.025	0.06	0.006	-2.86	4.34	0.493	1.47	20	2.273	3	0.62	0.07	0.5	0.057	0.28	0.032	1.4	0.159	0.34	2.94	0.334	1.08	2.43	0.276	0.89	9	1.023	2.2	0.21	0.024	0.71	0.081	0.62	0.07	1.33	0.151	0.29
17	Ulven	H94	M	1	9.5	2.25	37.5	3.947	3.62	0.35	0.037	0.21	0.022	0.06	0.006	-2.85	4.9	0.516	1.59	23	2.421	3.14	0.69	0.073	0.52	0.055	0.35	0.037	1.56	0.164	0.44	3.34	0.352	1.21	2.71	0.285	1	11	1.158	2.4	0.25	0.026	0.78	0.082	0.73	0.077	1.51	0.159	0.41
18	Ulven	H94	F	0	7.8	2.05	39.5	5.064	3.68	0.3	0.038	0.21	0.026	0.05	0.006	-3.03	3.66	0.469	1.3	17	2.179	2.83	0.57	0.073	0.4	0.051	0.24	0.031	1.21	0.155	0.19	2.45	0.314	0.9	1.88	0.241	0.63	8	1.026	2.08	0.2	0.026	0.55	0.071	0.47	0.06	1.02	0.131	0.02
20	Ulven	H94	F	0	7.6	2.03	33	4.342	3.5	0.31	0.04	0.2	0.026	0.05	0.006	-3.04	3.04	0.4	1.11	13	1.711	2.56	0.54	0.071	0.41	0.054	0.22	0.029	1.17	0.154	0.16	1.87	0.246	0.63	1.81	0.238	0.59	7	0.921	1.95	0.19	0.025	0.53	0.07	0.47	0.062	1	0.132	0
22	Ulven	H94	F	0	8.8	2.17	42	4.773	3.74	0.33	0.037	0.23	0.026	0.06	0.007	-2.86	3.56	0.405	1.27	17	1.932	2.83	0.61	0.069	0.43	0.049	0.24	0.027	1.28	0.145	0.25	2.28	0.259	0.82	1.84	0.209	0.61	7	0.795	1.95	0.22	0.025	0.53	0.06	0.52	0.059	1.05	0.119	0.05
24	Ulven	H94	F	0	8.4	2.13	36	4.286	3.58	0.34	0.04	0.22	0.026	0.06	0.007	-2.86	3.4	0.405	1.22	17	2.024	2.83	0.52	0.062	0.41	0.049	0.25	0.03	1.18	0.14	0.17	2.22	0.264	0.8	1.91	0.227	0.65	7	0.833	1.95	0.23	0.027	0.56	0.067	0.5	0.06	1.06	0.126	0.06
27	Ulven	H94	F	0	7.4	2	36	4.865	3.58	0.3	0.041	0.21	0.028	0.05	0.007	-3.03	3.35	0.453	1.21	15	2.027	2.71	0.52	0.07	0.36	0.049	0.28	0.038	1.16	0.157	0.15	2.19	0.296	0.78	1.8	0.243	0.59	8	1.081	2.08	0.18	0.024	0.54	0.073	0.47	0.064	1.01	0.136	0.01
28	Ulven	H94	F	0	7.7	2.04	43	5.584	3.76	0.33	0.042	0.22	0.029	0.06	0.007	-2.88	3.38	0.439	1.22	15	1.948	2.71	0.53	0.069	0.38	0.049	0.25	0.032	1.16	0.151	0.15	2.22	0.288	0.8	1.9	0.247	0.64	8	1.039	2.08	0.16	0.021	0.52	0.068	0.5	0.065	1.02	0.132	0.02
29	Ulven	H94	M	1	9	2.2	40	4.444	3.69	0.34	0.038	0.23	0.026	0.06	0.007	-2.79	4.1	0.456	1.41	21	2.333	3.04	0.63	0.07	0.46	0.051	0.3	0.033	1.39	0.154	0.33	2.71	0.301	1	2.25	0.25	0.81	10	1.111	2.3			0.64	0.071	0.6	0.067	1.24	0.138	0.22
30	Ulven	H94	F	0	8.9	2.19	37.5	4.213	3.62	0.35	0.039	0.23	0.026	0.06	0.007	-2.78	3.9	0.438	1.36	20	2.247	3	0.62	0.07	0.44	0.049	0.25	0.028	1.31	0.147	0.27	2.59	0.291	0.95	2.03	0.228	0.71	8	0.899	2.08	0.2	0.022	0.57	0.064	0.53	0.06	1.1	0.124	0.1
31	Ulven	H94	F	0	8.4	2.13	36.5	4.345	3.6	0.33	0.039	0.22	0.026	0.05	0.007	-2.9	3.53	0.42	1.26	17	2.024	2.83	0.56	0.067	0.41	0.049	0.24	0.029	1.21	0.144	0.19	2.32	0.276	0.84	1.9	0.226	0.64	8	0.952	2.08	0.23	0.027	0.56	0.067	0.5	0.06	1.06	0.126	0.06
32	Ulven	H94	M	1	6.5	1.87	30	4.615	3.4	0.28	0.043	0.17	0.026	0.04	0.006	-3.29	2.81	0.432	1.03	14	2.154	2.64	0.46	0.071	0.32	0.049	0.22	0.034	1	0.154	0	1.81	0.278	0.59	1.46	0.225	0.38	7	1.077	1.95			0.45	0.069	0.37	0.057	0.82	0.126	-0.2
34	Ulven	H94	F	0	6.9	1.93	35	5.072	3.56	0.29	0.042	0.18	0.026	0.04	0.006	-3.19	3.03	0.439	1.11	16	2.319	2.77	0.49	0.071	0.32	0.046	0.2	0.029	1.01	0.146	0.01	2.02	0.293	0.7	1.62	0.235	0.48	7	1.014	1.95	0.17	0.025	0.47	0.068	0.39	0.057	0.86	0.125	-0.15
36	Ulven	H94	F	0	7.4	2	38	5.135	3.64	0.3	0.041	0.2	0.027	0.05	0.006	-3.05	3.02	0.408	1.11	16	2.162	2.77	0.52	0.07	0.31	0.042	0.19	0.026	1.02	0.138	0.02	2	0.27	0.69	1.66	0.224	0.51	8	1.081	2.08			0.51	0.069	0.42	0.057	0.93	0.126	-0.07
37	Ulven	H94	F	0	8	2.08	35.5	4.438	3.57	0.31	0.038	0.23	0.028	0.05	0.007	-2.92	3.11	0.389	1.13	16	2	2.77	0.56	0.07	0.35	0.044	0.21	0.026	1.12	0.14	0.11	1.99	0.249	0.69	1.65	0.206	0.5	7	0.875	1.95			0.53	0.066	0.44	0.055	0.97	0.121	-0.03
38	Ulven	H94	F	0	7	1.95	39.5	5.643	3.68	0.33	0.046	0.21	0.029	0.05	0.007	-2.95	2.57	0.367	0.94	14	2	2.64	0.43	0.061	0.33	0.047	0.19	0.027	0.95	0.136	-0.05	1.62	0.231	0.48	1.41	0.201	0.34	6	0.857	1.79	0.16	0.023	0.45	0.064	0.36	0.051	0.81	0.116	-0.21
39	Ulven	VS95	M	1	14.2	2.65	51	3.592	3.93	0.43	0.03	0.27	0.019	0.09	0.006	-2.41	5.46	0.385	1.7	21	1.479	3.04	0.9	0.063	0.7	0.049	0.4	0.028	2	0.141	0.69	3.46	0.244	1.24	3.87	0.273	1.35	11	0.775	2.4	0.33	0.023	1.14	0.08	1.07	0.075	2.21	0.156	0.79
41	Ulven	VS95	F	0	13.2	2.58	47	3.561	3.85	0.42	0.032	0.27	0.02	0.09	0.007	-2.42	5.03	0.381	1.62	22	1.667	3.09	0.77	0.058	0.54	0.041	0.31	0.023	1.62	0.123	0.48	3.41	0.258	1.23	2.57	0.195	0.94	10	0.758	2.3			0.76	0.058	0.63	0.048	1.39	0.105	0.33
42	Ulven	VS95	M	1	14.9	2.7	53.5	3.591	3.98	0.46	0.031	0.31	0.021	0.11	0.007	-2.2	6.33	0.425	1.85	23	1.544	3.14	0.96	0.064	0.77	0.052	0.39	0.026	2.12	0.142	0.75	4.21	0.283	1.44	4.36	0.293	1.47	12	0.805	2.48	0.39	0.026	1.27	0.085	1.18	0.079	2.45	0.164	0.9
43	Ulven	VS95	F	0	11	2.4	46.5	4.227	3.84	0.4	0.036	0.27	0.025	0.08	0.008	-2.47	4.04	0.367	1.4	18	1.636	2.89	0.66	0.06	0.46	0.042	0.29	0.026	1.41	0.128	0.34	2.63	0.239	0.97	2.19	0.199	0.78	8	0.727	2.08			0.65	0.059	0.55	0.05	1.2	0.109	0.18
44	Ulven	VS95	M	1	13.8	2.62	50.5	3.659	3.92	0.39	0.028	0.27	0.02	0.08	0.006	-2.49	5.95	0.431	1.78	23	1.667	3.14	0.88	0.064	0.73	0.053	0.42	0.03	2.03	0.147	0.71	3.92	0.284	1.37	3.88	0.281	1.36	12	0.87	2.48	0.36	0.026	1.12	0.081	1.05	0.076	2.17	0.157	0.77
45	Ulven	VS95	M	1	14	2.64	51	3.643	3.93	0.46	0.033	0.28	0.02	0.1	0.007	-2.3	5.94	0.424	1.78	23	1.643	3.14	0.92	0.066	0.75	0.054	0.37	0.026	2.04	0.146	0.71	3.9	0.279	1.36	3.83	0.274	1.34	13	0.929	2.56	0.34	0.024	1.11	0.079	1.03	0.074	2.14	0.153	0.76
46	Ulven	VS95	F	0	10.8	2.38	50.5	4.676	3.92	0.41	0.038	0.26	0.024	0.08	0.008	-2.51	4.15	0.384	1.42	18	1.667	2.89	0.71	0.066	0.46	0.043	0.28	0.026	1.45	0.134	0.37	2.7	0.25	0.99	2.28	0.211	0.82	7	0.648	1.95	0.23	0.021	0.68	0.063	0.56	0.052	1.24	0.115	0.22
47	Ulven	VS95	M	1	15	2.71	53	3.533	3.97	0.41	0.027	0.26	0.017	0.08	0.006	-2.48	6.36	0.424	1.85	24	1.6	3.18	0.96	0.064	0.75	0.05	0.46	0.031	2.17	0.145	0.77	4.19	0.279	1.43	4.35	0.29	1.47	13	0.867	2.56	0.4	0.027	1.22	0.081	1.2	0.08	2.42	0.161	0.88
48	Ulven	VS95	F	0	12.2	2.5	48	3.934	3.87	0.43	0.035	0.27	0.022	0.09	0.007	-2.43	4.55	0.373	1.52	20	1.639	3	0.73	0.06	0.58	0.048	0.28	0.023	1.59	0.13	0.46	2.96	0.243	1.09	2.4	0.197	0.88	7	0.574	1.95	0.27	0.022	0.75	0.061	0.66	0.054	1.41	0.116	0.34
49	Ulven	VS95	M	1	14.1	2.65	51.5	3.652	3.94	0.43	0.03	0.26	0.018	0.09	0.006	-2.45	5.36	0.38	1.68	21	1.489	3.04	0.91	0.065	0.65	0.046	0.39	0.028	1.95	0.138	0.67	3.41	0.242	1.23	3.58	0.254	1.28	11	0.78	2.4	0.4	0.028	1.06	0.075	1.01	0.072	2.07	0.147	0.73
50	Ulven	VS95	F	0	12	2.48	47.5	3.958	3.86	0.39	0.033	0.26	0.022	0.08	0.007	-2.53	4.2	0.35	1.44	18	1.5	2.89	0.68	0.057	0.52	0.043	0.29	0.024	1.49	0.124	0.4	2.71	0.226	1	2.3	0.192	0.83	8	0.667	2.08	0.33	0.028	0.73	0.061	0.57	0.048	1.3	0.108	0.26
52	Ulven	VS95	M	1	14.6	2.68	56.5	3.87	4.03	0.46	0.032	0.28	0.019	0.1	0.007	-2.31	5.84	0.4	1.76	21	1.438	3.04	0.99	0.068	0.8	0.055	0.52	0.036	2.31	0.158	0.84	3.53	0.242	1.26	4.32	0.296	1.46	13	0.89	2.56	0.36	0.025	1.42	0.097	1.08	0.074	2.5	0.171	0.92
53	Ulven	VS95	M	1	13.8	2.62	51	3.696	3.93	0.42	0.03	0.28	0.02	0.09	0.007	-2.38	5.75	0.417	1.75	22	1.594	3.09	0.86	0.062	0.71	0.051	0.43	0.031	2	0.145	0.69	3.75	0.272	1.32	3.76	0.272	1.32	11	0.797	2.4	0.35	0.025	1.07	0.078	1.11	0.08	2.18	0.158	0.78
54	Ulven	VS95	F	0	12.4	2.52	46.5	3.75	3.84	0.39	0.031	0.28	0.023	0.08	0.007	-2.47	4.36	0.352	1.47	19	1.532	2.94	0.73	0.059	0.43	0.035	0.27	0.022	1.43	0.115	0.36	2.93	0.236	1.08	2.34	0.189	0.85	9	0.726	2.2	0.24	0.019	0.7	0.056	0.63	0.051	1.33	0.107	0.29
55	Ulven	VS95	M	1	14.1	2.65	56	3.972	4.03	0.46	0.033	0.28	0.02	0.1	0.007	-2.31	4.91	0.348	1.59	18	1.277	2.89	0.95	0.067	0.68	0.048	0.4	0.028	2.03	0.144	0.71	2.88	0.204	1.06	3.92	0.278	1.37	12	0.851	2.48	0.39	0.028	1.22	0.087	1.11	0.079	2.33	0.165	0.85
56	Ulven	VS95	F	0	11.7	2.46	47.5	4.06	3.86	0.39	0.033	0.26	0.022	0.08	0.007	-2.53	4.71	0.403	1.55	20	1.709	3	0.72	0.062	0.6	0.051	0.3	0.026	1.62	0.138	0.48	3.09	0.264	1.13	2.49	0.213	0.91	8	0.684	2.08	0.39	0.033	0.74	0.063	0.67	0.057	1.41	0.121	0.34
57	Ulven	VS95	M	1	11.5	2.44	53.5	4.652	3.98	0.38	0.033	0.24	0.02	0.07	0.006	-2.66	5.15	0.448	1.64	22	1.913	3.09	0.77	0.067	0.59	0.051	0.34	0.03	1.7	0.148	0.53	3.45	0.3	1.24	3.24	0.282	1.18	12	1.043	2.48	0.4	0.035	0.94	0.082	0.9	0.078	1.84	0.16	0.61
58	Ulven	VS95	M	1	13	2.56	41.5	3.192	3.73	0.42	0.032	0.3	0.023	0.1	0.008	-2.33	5.14	0.395	1.64	22	1.692	3.09	0.9	0.069	0.62	0.048	0.35	0.027	1.87	0.144	0.63	3.27	0.252	1.18	3.47	0.267	1.24	11	0.846	2.4	0.36	0.028	1.09	0.084	0.94	0.072	2.03	0.156	0.71
59	Ulven	VS95	M	1	12.4	2.52	45	3.629	3.81	0.38	0.03	0.25	0.02	0.07	0.006	-2.61	5.03	0.406	1.62	21	1.694	3.04	0.84	0.068	0.57	0.046	0.34	0.027	1.75	0.141	0.56	3.28	0.265	1.19	3.44	0.277	1.24	10	0.806	2.3	0.3	0.024	1.04	0.084	0.94	0.076	1.98	0.16	0.68
60	Ulven	VS95	F	0	13.3	2.59	57	4.286	4.04	0.45	0.033	0.28	0.021	0.1	0.007	-2.32	4.91	0.369	1.59	22	1.654	3.09	0.84	0.063	0.53	0.04	0.3	0.023	1.67	0.126	0.51	3.24	0.244	1.18	2.71	0.204	1	10	0.752	2.3	0.28	0.021	0.81	0.061	0.67	0.05	1.48	0.111	0.39
61	Ulven	VS95	F	0	10.2	2.32	54	5.294	3.99	0.38	0.037	0.29	0.028	0.09	0.008	-2.46	4.22	0.414	1.44	18	1.765	2.89	0.63	0.062	0.49	0.048	0.28	0.027	1.4	0.137	0.34	2.82	0.276	1.04	2.25	0.221	0.81	7	0.686	1.95			0.68	0.067	0.61	0.06	1.29	0.126	0.25
62	Ulven	VS95	F	0	13.4	2.6	56	4.179	4.03	0.44	0.032	0.29	0.021	0.1	0.007	-2.33	5.18	0.387	1.64	22	1.642	3.09	0.75	0.056	0.56	0.042	0.39	0.029	1.7	0.127	0.53	3.48	0.26	1.25	2.88	0.215	1.06	9	0.672	2.2	0.31	0.023	0.85	0.063	0.74	0.055	1.59	0.119	0.46
63	Ulven	VS95	F	0	12.3	2.51	53	4.309	3.97	0.45	0.036	0.3	0.024	0.1	0.008	-2.27	5.19	0.422	1.65	22	1.789	3.09	0.81	0.066	0.57	0.046	0.33	0.027	1.71	0.139	0.54	3.48	0.283	1.25	2.69	0.219	0.99	8	0.65	2.08	0.28	0.023	0.78	0.063	0.7	0.057	1.48	0.12	0.39
64	Ulven	VS95	F	0	11.2	2.42	44.5	3.973	3.8	0.4	0.035	0.25	0.022	0.08	0.007	-2.56	4.71	0.421	1.55	20	1.786	3	0.74	0.066	0.49	0.044	0.32	0.029	1.55	0.138	0.44	3.16	0.282	1.15	2.34	0.209	0.85	7	0.625	1.95	0.23	0.021	0.72	0.064	0.57	0.051	1.29	0.115	0.25
65	Grotte	H94	M	1	21	3.04	53.5	2.548	3.98	0.5	0.024	0.33	0.016	0.13	0.006	-2.04	11.5	0.548	2.44	36	1.714	3.58	1.16	0.055	1.03	0.049	0.69	0.033	2.88	0.137	1.06	8.62	0.41	2.15	7	0.333	1.95	17	0.81	2.83	0.56	0.026	1.64	0.078	1.8	0.086	3.99	0.19	1.38
66	Grotte	H94	M	1	19	2.94	53	2.789	3.97	0.49	0.026	0.3	0.016	0.12	0.006	-2.16	9.8	0.516	2.28	31	1.632	3.43	1.16	0.061	0.83	0.044	0.64	0.034	2.64	0.139	0.97	7.16	0.377	1.97	6.4	0.337	1.86	16	0.842	2.77	0.43	0.022	1.54	0.081	1.55	0.082	3.52	0.185	1.26
67	Grotte	H94	M	1	15.5	2.74	42	2.71	3.74	0.36	0.023	0.31	0.02	0.09	0.006	-2.43	8.8	0.568	2.17	30	1.935	3.4	0.98	0.063	0.74	0.048	0.54	0.035	2.26	0.146	0.81	6.54	0.422	1.88	5.1	0.329	1.63	14	0.903	2.64	0.49	0.032	1.24	0.08	1.23	0.079	2.96	0.191	1.09
68	Grotte	H94	M	1	17.4	2.86	55	3.161	4.01	0.48	0.028	0.31	0.018	0.12	0.007	-2.15	10.8	0.621	2.38	36	2.069	3.58	1.15	0.066	0.93	0.054	0.67	0.039	2.75	0.158	1.01	8.05	0.463	2.09	6.2	0.356	1.82	16	0.92	2.77	0.49	0.028	1.46	0.084	1.54	0.088	3.49	0.2	1.25
69	Grotte	H94	M	1	15.7	2.75	35.5	2.261	3.57	0.36	0.023	0.28	0.018	0.08	0.005	-2.54	8.2	0.522	2.1	28	1.783	3.33	0.98	0.063	0.75	0.048	0.49	0.031	2.23	0.142	0.8	5.97	0.381	1.79	5	0.318	1.61	15	0.955	2.71	0.34	0.022	1.24	0.079	1.19	0.076	2.78	0.177	1.02
70	Grotte	H94	M	1	14.2	2.65	43	3.028	3.76	0.41	0.029	0.27	0.019	0.09	0.006	-2.44	7.7	0.542	2.04	27	1.901	3.3	0.98	0.069	0.7	0.05	0.49	0.035	2.18	0.153	0.78	5.52	0.389	1.71	4.5	0.317	1.5	12	0.845	2.48	0.38	0.027	1.15	0.081	1.06	0.075	2.59	0.182	0.95
71	Grotte	H94	M	1	18	2.89	40	2.222	3.69	0.42	0.023	0.33	0.018	0.11	0.006	-2.22	10.1	0.561	2.31	32	1.778	3.47	0.9	0.05	0.9	0.05	0.57	0.032	2.37	0.132	0.86	7.73	0.429	2.04	5.8	0.322	1.76	16	0.889	2.77	0.41	0.023	1.39	0.077	1.46	0.081	3.26	0.181	1.18
72	Grotte	H94	M	1	18.3	2.91	43	2.35	3.76	0.45	0.025	0.31	0.017	0.11	0.006	-2.21	9.9	0.541	2.29	31	1.694	3.43	1.15	0.063	0.87	0.047	0.67	0.037	2.68	0.147	0.99	7.22	0.394	1.98	5.8	0.317	1.76	15	0.82	2.71	0.33	0.018	1.26	0.069	1.47	0.08	3.06	0.167	1.12
73	Grotte	H94	M	1	17.7	2.87	49	2.768	3.89	0.41	0.023	0.29	0.016	0.09	0.005	-2.37	10	0.565	2.3	33	1.864	3.5	0.82	0.046	0.79	0.044	0.54	0.031	2.14	0.121	0.76	7.86	0.444	2.06	6.2	0.35	1.82	17	0.96	2.83	0.51	0.029	1.42	0.08	1.46	0.082	3.39	0.191	1.22
74	Grotte	H94	M	1	20.3	3.01	48	2.365	3.87	0.45	0.022	0.31	0.015	0.11	0.005	-2.21	12.3	0.606	2.51	37	1.823	3.61	1.18	0.058	1.05	0.052	0.79	0.039	3.01	0.148	1.1	9.29	0.458	2.23	7.2	0.355	1.97	17	0.837	2.83	0.49	0.024	1.72	0.085	1.72	0.085	3.93	0.193	1.37
75	Grotte	H94	M	1	12.5	2.53	40	3.2	3.69	0.35	0.028	0.23	0.018	0.06	0.005	-2.76	6.8	0.544	1.92	25	2	3.22	0.75	0.06	0.65	0.052	0.41	0.033	1.82	0.145	0.6	4.98	0.399	1.61	3.3	0.264	1.19	11	0.88	2.4	0.31	0.025	0.88	0.071	0.82	0.065	2.01	0.161	0.7
76	Grotte	H94	F	0	18.8	2.93	43.5	2.314	3.77	0.45	0.024	0.33	0.018	0.12	0.006	-2.15	10	0.532	2.3	30	1.596	3.4	0.98	0.052	0.93	0.05	0.62	0.033	2.54	0.135	0.93	7.46	0.397	2.01	5.2	0.277	1.65	12	0.638	2.48	0.41	0.022	1.33	0.071	1.29	0.069	3.03	0.161	1.11
77	Grotte	H94	F	0	11.3	2.42	28.5	2.522	3.35	0.28	0.025	0.22	0.019	0.05	0.004	-3.03	5.8	0.513	1.76	22	1.947	3.09	0.43	0.038	0.49	0.043	0.47	0.042	1.39	0.123	0.33	4.41	0.39	1.48	2.7	0.239	0.99	9	0.796	2.2	0.26	0.023	0.65	0.058	0.65	0.058	1.57	0.139	0.45
78	Grotte	H94	F	0	13.3	2.59	49	3.684	3.89	0.4	0.03	0.28	0.021	0.09	0.007	-2.43	7.6	0.571	2.03	28	2.105	3.33	0.9	0.068	0.62	0.047	0.41	0.031	1.93	0.145	0.66	5.67	0.426	1.73	3.4	0.256	1.22	11	0.827	2.4	0.33	0.025	0.88	0.066	0.83	0.063	2.05	0.154	0.72
79	Grotte	H94	F	0	15.6	2.75	47.5	3.045	3.86	0.4	0.026	0.33	0.021	0.1	0.007	-2.27	6.8	0.436	1.92	23	1.474	3.14	0.9	0.058	0.54	0.035	0.31	0.02	1.75	0.112	0.56	5.05	0.324	1.62	4.3	0.276	1.46	12	0.769	2.48	0.2	0.013	1.1	0.07	1	0.064	2.29	0.147	0.83
80	Grotte	H94	F	0	16.8	2.82	43.5	2.589	3.77	0.46	0.027	0.3	0.018	0.11	0.006	-2.22	9.5	0.565	2.25	29	1.726	3.37	0.98	0.058	0.74	0.044	0.54	0.032	2.26	0.134	0.81	7.24	0.431	1.98	4.5	0.268	1.5	12	0.714	2.48	0.36	0.021	1.1	0.065	1.05	0.062	2.5	0.149	0.92
81	Grotte	H94	F	0	16.3	2.79	50	3.067	3.91	0.39	0.024	0.3	0.018	0.09	0.006	-2.39	9.2	0.564	2.22	33	2.025	3.5	0.64	0.039	0.75	0.046	0.57	0.035	1.96	0.12	0.67	7.24	0.444	1.98	4.3	0.264	1.46	11	0.675	2.4	0.31	0.019	1.06	0.065	1.06	0.065	2.44	0.15	0.89
82	Grotte	H94	F	0	17.2	2.84	41	2.384	3.71	0.43	0.025	0.34	0.02	0.11	0.007	-2.16	9.6	0.558	2.26	28	1.628	3.33	0.87	0.05	0.82	0.048	0.51	0.029	2.19	0.128	0.79	7.41	0.431	2	4.3	0.25	1.46	10	0.581	2.3	0.41	0.024	1.1	0.064	1.06	0.062	2.57	0.149	0.94
83	Grotte	H94	F	0	15.9	2.77	43	2.704	3.76	0.39	0.025	0.32	0.02	0.1	0.006	-2.32	7	0.44	1.95	21	1.321	3.04	0.9	0.057	0.82	0.051	0.52	0.033	2.24	0.141	0.81	4.76	0.299	1.56	4.8	0.302	1.57	13	0.818	2.56	0.34	0.022	1.13	0.071	1.06	0.067	2.54	0.16	0.93
84	Grotte	H94	F	0	14.1	2.65	46.5	3.298	3.84	0.38	0.027	0.31	0.022	0.09	0.007	-2.38	7.3	0.518	1.99	26	1.844	3.26	0.77	0.055	0.65	0.046	0.49	0.035	1.91	0.136	0.65	5.39	0.382	1.68	3.7	0.262	1.31	9	0.638	2.2	0.39	0.028	0.92	0.065	0.98	0.07	2.29	0.163	0.83
85	Grotte	H94	F	0	14.3	2.66	40	2.797	3.69	0.41	0.029	0.28	0.02	0.09	0.006	-2.41	7.7	0.538	2.04	26	1.818	3.26	0.75	0.053	0.59	0.041	0.47	0.033	1.82	0.127	0.6	5.88	0.411	1.77	3.5	0.245	1.25	10	0.699	2.3	0.28	0.019	0.87	0.061	0.83	0.058	1.98	0.138	0.68
86	Grotte	H94	F	0	15.7	2.75	35.5	2.261	3.57	0.38	0.024	0.3	0.019	0.09	0.006	-2.41	8.4	0.535	2.13	26	1.656	3.26	1.05	0.067	0.74	0.047	0.56	0.035	2.34	0.149	0.85	6.06	0.386	1.8	4.4	0.28	1.48	13	0.828	2.56	0.38	0.024	1.03	0.066	0.93	0.059	2.34	0.149	0.85
87	Grotte	VS95	M	1	16.9	2.83	49	2.899	3.89	0.4	0.024	0.3	0.018	0.09	0.006	-2.36	9.1	0.538	2.21	28	1.657	3.33	0.98	0.058	0.82	0.048	0.65	0.039	2.45	0.145	0.9	6.65	0.393	1.89	6	0.355	1.79	17	1.006	2.83	0.46	0.027	1.39	0.082	1.51	0.089	3.36	0.199	1.21
88	Grotte	VS95	M	1	14.8	2.69	42	2.838	3.74	0.38	0.026	0.28	0.019	0.08	0.006	-2.48	8.4	0.568	2.13	27	1.824	3.3	0.88	0.06	0.79	0.053	0.56	0.038	2.23	0.15	0.8	6.17	0.417	1.82	5.2	0.351	1.65	15	1.014	2.71	0.33	0.022	1.28	0.086	1.26	0.085	2.86	0.194	1.05
89	Grotte	VS95	M	1	20.7	3.03	46	2.222	3.83	0.45	0.022	0.32	0.015	0.11	0.005	-2.18	12.3	0.594	2.51	38	1.836	3.64	1.13	0.055	1.18	0.057	0.9	0.043	3.21	0.155	1.17	9.09	0.439	2.21	6.9	0.333	1.93	14	0.676	2.64	0.41	0.02	1.8	0.087	1.8	0.087	4.01	0.194	1.39
90	Grotte	VS95	M	1	19.7	2.98	38.5	1.954	3.65	0.41	0.021	0.31	0.016	0.1	0.005	-2.3	9	0.457	2.2	23	1.168	3.14	1.11	0.056	0.93	0.047	0.72	0.037	2.77	0.14	1.02	6.23	0.316	1.83	6.4	0.325	1.86	17	0.863	2.83	0.33	0.017	1.6	0.081	1.62	0.082	3.55	0.18	1.27
91	Grotte	VS95	M	1	17.9	2.88	36	2.011	3.58	0.4	0.022	0.32	0.018	0.1	0.006	-2.3	10.4	0.581	2.34	34	1.899	3.53	0.93	0.052	0.82	0.046	0.59	0.033	2.34	0.131	0.85	8.06	0.45	2.09	6	0.335	1.79	16	0.894	2.77	0.39	0.022	1.42	0.08	1.39	0.078	3.21	0.179	1.17
92	Grotte	VS95	M	1	15	2.71	42.5	2.833	3.75	0.39	0.026	0.29	0.019	0.09	0.006	-2.42	8.1	0.54	2.09	28	1.867	3.33	0.8	0.053	0.72	0.048	0.49	0.033	2.01	0.134	0.7	6.09	0.406	1.81	4.4	0.293	1.48	14	0.933	2.64	0.39	0.026	1.11	0.074	1.01	0.068	2.52	0.168	0.92
93	Grotte	VS95	M	1	20.9	3.04	36	1.722	3.58	0.4	0.019	0.32	0.015	0.1	0.005	-2.3	11.7	0.56	2.46	37	1.77	3.61	1.08	0.052	0.97	0.046	0.69	0.033	2.73	0.131	1.01	8.97	0.429	2.19	6	0.287	1.79	12	0.574	2.48	0.54	0.026	1.69	0.081	1.72	0.082	3.94	0.189	1.37
94	Grotte	VS95	M	1	18.4	2.91	41.5	2.255	3.73	0.4	0.022	0.31	0.017	0.1	0.005	-2.33	11.2	0.609	2.42	36	1.957	3.58	0.97	0.052	0.97	0.052	0.7	0.038	2.64	0.143	0.97	8.56	0.465	2.15	6.4	0.348	1.86	16	0.87	2.77	0.51	0.028	1.59	0.086	1.52	0.083	3.62	0.197	1.29
95	Grotte	VS95	M	1	19.1	2.95	44	2.304	3.78	0.41	0.021	0.32	0.017	0.1	0.005	-2.27	7.4	0.387	2	21	1.099	3.04	1.26	0.066	0.83	0.044	0.59	0.031	2.68	0.141	0.99	4.72	0.247	1.55	6.1	0.319	1.81	16	0.838	2.77	0.36	0.019	1.55	0.081	1.47	0.077	3.39	0.177	1.22
96	Grotte	VS95	M	1	18	2.89	58	3.222	4.06	0.41	0.023	0.32	0.018	0.1	0.006	-2.27	9.4	0.522	2.24	27	1.5	3.3	1.03	0.057	0.9	0.05	0.67	0.037	2.6	0.145	0.96	6.8	0.378	1.92	6.3	0.35	1.84	18	1	2.89	0.38	0.021	1.47	0.082	1.47	0.082	3.32	0.185	1.2
97	Grotte	VS95	M	1	11.8	2.47	32	2.712	3.47	0.31	0.026	0.23	0.019	0.06	0.005	-2.88	6.8	0.576	1.92	24	2.034	3.18	0.7	0.06	0.56	0.047	0.41	0.035	1.67	0.141	0.51	5.13	0.435	1.64	3.2	0.271	1.16	12	1.017	2.48	0.28	0.024	0.83	0.071	0.85	0.072	1.96	0.166	0.67
98	Grotte	VS95	M	1	11	2.4	27.5	2.5	3.31	0.26	0.024	0.2	0.018	0.04	0.004	-3.2	5.3	0.482	1.67	18	1.636	2.89	0.72	0.065	0.52	0.048	0.38	0.034	1.62	0.147	0.48	3.68	0.335	1.3	2.9	0.264	1.06	10	0.909	2.3	0.29	0.027	0.72	0.065	0.7	0.064	1.72	0.156	0.54
99	Grotte	VS95	F	0	15.2	2.72	44.5	2.928	3.8	0.38	0.025	0.27	0.018	0.08	0.005	-2.52	8.6	0.566	2.15	31	2.039	3.43	0.83	0.055	0.7	0.046	0.44	0.029	1.98	0.13	0.68	6.62	0.436	1.89	3.7	0.243	1.31	12	0.789	2.48	0.33	0.022	0.97	0.064	0.8	0.053	2.09	0.138	0.74
100	Grotte	VS95	F	0	15.5	2.74	44	2.839	3.78	0.37	0.024	0.29	0.019	0.08	0.005	-2.47	5.9	0.381	1.77	20	1.29	3	0.9	0.058	0.62	0.04	0.52	0.034	2.05	0.132	0.72	3.85	0.249	1.35	4.2	0.271	1.44	13	0.839	2.56	0.33	0.021	1.05	0.068	0.98	0.063	2.36	0.152	0.86
101	Grotte	VS95	F	0	8.9	2.19	36	4.045	3.58	0.27	0.03	0.21	0.024	0.04	0.005	-3.11	4.7	0.528	1.55	17	1.91	2.83	0.46	0.051	0.41	0.046	0.33	0.037	1.19	0.134	0.18	3.51	0.394	1.25	1.7	0.191	0.53	8	0.899	2.08	0.21	0.024	0.49	0.055	0.43	0.048	1.13	0.127	0.12
102	Grotte	VS95	F	0	15.9	2.77	37.5	2.358	3.62	0.39	0.025	0.27	0.017	0.08	0.005	-2.49	8.5	0.535	2.14	27	1.698	3.3	0.83	0.052	0.67	0.042	0.43	0.027	1.93	0.121	0.66	6.57	0.413	1.88	4.1	0.258	1.41	11	0.692	2.4	0.28	0.017	1.06	0.067	0.92	0.058	2.26	0.142	0.81
103	Grotte	VS95	F	0	16.8	2.82	50	2.976	3.91	0.42	0.025	0.3	0.018	0.1	0.006	-2.31	8.8	0.524	2.17	27	1.607	3.3	1.03	0.061	0.72	0.043	0.54	0.032	2.29	0.136	0.83	6.51	0.387	1.87	4.2	0.25	1.44	11	0.655	2.4	0.34	0.02	1.06	0.063	1.06	0.063	2.47	0.147	0.9
104	Grotte	VS95	F	0	15.7	2.75	43.5	2.771	3.77	0.41	0.026	0.3	0.019	0.1	0.006	-2.34	8.9	0.567	2.19	30	1.911	3.4	0.82	0.052	0.72	0.046	0.46	0.029	2	0.127	0.69	6.9	0.44	1.93	4.1	0.261	1.41	11	0.701	2.4	0.33	0.021	1.05	0.067	0.93	0.059	2.31	0.147	0.84
105	Grotte	VS95	F	0	18.7	2.93	46	2.46	3.83	0.42	0.022	0.31	0.017	0.1	0.005	-2.28	8.8	0.471	2.17	28	1.497	3.33	1.01	0.054	0.77	0.041	0.59	0.032	2.37	0.127	0.86	6.43	0.344	1.86	4.6	0.246	1.53	13	0.695	2.56	0.38	0.02	1.06	0.057	1.11	0.06	2.55	0.137	0.94
106	Grotte	VS95	F	0	15.2	2.72	38	2.5	3.64	0.37	0.024	0.25	0.016	0.07	0.005	-2.62	7.7	0.507	2.04	25	1.645	3.22	0.82	0.054	0.65	0.043	0.47	0.031	1.95	0.128	0.67	5.75	0.378	1.75	3.5	0.23	1.25	10	0.658	2.3	0.41	0.027	0.9	0.059	0.88	0.058	2.19	0.144	0.79
107	Grotte	VS95	F	0	16.4	2.8	38	2.317	3.64	0.39	0.024	0.27	0.016	0.08	0.005	-2.49	8.8	0.537	2.17	26	1.585	3.26	0.95	0.058	0.77	0.047	0.57	0.035	2.29	0.14	0.83	6.51	0.397	1.87	4.6	0.28	1.53	12	0.732	2.48	0.36	0.022	1.15	0.07	1.06	0.065	2.57	0.157	0.94
108	Grotte	VS95	F	0	9.4	2.24	34.5	3.67	3.54	0.3	0.032	0.21	0.022	0.05	0.005	-3.01	5	0.532	1.61	18	1.915	2.89	0.57	0.061	0.43	0.045	0.34	0.037	1.34	0.143	0.29	3.66	0.389	1.3	2.4	0.255	0.88	9	0.957	2.2	0.31	0.033	0.62	0.066	0.57	0.061	1.51	0.16	0.41
109	Grotte	VS95	F	0	13.9	2.63	39	2.806	3.66	0.32	0.023	0.24	0.017	0.06	0.004	-2.81	6.7	0.482	1.9	22	1.583	3.09	0.67	0.048	0.64	0.046	0.43	0.031	1.73	0.125	0.55	4.97	0.357	1.6	3.3	0.237	1.19	10	0.719	2.3	0.29	0.021	0.87	0.062	0.72	0.052	1.88	0.135	0.63
110	Grotte	VS95	F	0	11.6	2.45	32.5	2.802	3.48	0.3	0.026	0.24	0.021	0.06	0.005	-2.87	5.7	0.491	1.74	18	1.552	2.89	0.74	0.063	0.56	0.048	0.41	0.035	1.7	0.147	0.53	4	0.345	1.39	2.8	0.241	1.03	10	0.862	2.3	0.25	0.021	0.7	0.061	0.69	0.059	1.64	0.141	0.49
135	Overfl	H94	M	1	15.1	2.71	66	4.371	4.19	0.5	0.033	0.34	0.023	0.13	0.009	-2.01	6.8	0.45	1.92	27	1.788	3.3	0.82	0.054	0.74	0.049	0.43	0.028	1.98	0.131	0.68	4.82	0.319	1.57	4.3	0.285	1.46	11	0.728	2.4	0.41	0.027	1.21	0.08	1.16	0.077	2.78	0.184	1.02
136	Overfl	H94	M	1	9	2.2	51	5.667	3.93	0.39	0.043	0.25	0.028	0.08	0.009	-2.57	4.3	0.478	1.46	20	2.222	3	0.64	0.071	0.47	0.053	0.28	0.031	1.39	0.155	0.33	2.91	0.323	1.07	2.8	0.311	1.03	8	0.889	2.08	0.25	0.027	0.74	0.082	0.67	0.075	1.65	0.184	0.5
137	Overfl	H94	M	1	11	2.4	49.5	4.5	3.9	0.4	0.036	0.26	0.024	0.08	0.007	-2.51	5.1	0.464	1.63	21	1.909	3.04	0.65	0.06	0.54	0.049	0.34	0.031	1.54	0.14	0.43	3.56	0.324	1.27	3	0.273	1.1	9	0.818	2.2	0.26	0.024	0.85	0.077	0.8	0.073	1.91	0.174	0.65
138	Overfl	H94	M	1	10.6	2.36	64	6.038	4.16	0.43	0.041	0.27	0.025	0.09	0.009	-2.4	4.8	0.453	1.57	20	1.887	3	0.62	0.059	0.51	0.048	0.33	0.031	1.46	0.137	0.38	3.34	0.315	1.21	2.7	0.255	0.99	9	0.849	2.2	0.25	0.023	0.79	0.074	0.7	0.066	1.73	0.164	0.55
139	Overfl	H94	M	1	14.1	2.65	67.5	4.787	4.21	0.51	0.036	0.34	0.024	0.14	0.01	-1.99	6.3	0.447	1.84	26	1.844	3.26	0.82	0.058	0.74	0.052	0.43	0.03	1.98	0.14	0.68	4.32	0.306	1.46	4	0.284	1.39	11	0.78	2.4	0.41	0.029	1.18	0.084	1.11	0.079	2.7	0.192	0.99
140	Overfl	H94	M	1	11.2	2.42	53	4.732	3.97	0.48	0.043	0.33	0.029	0.12	0.011	-2.08	6.4	0.571	1.86	23	2.054	3.14	0.93	0.083	0.82	0.073	0.44	0.039	2.19	0.196	0.79	4.21	0.376	1.44	4.4	0.393	1.48	11	0.982	2.4	0.41	0.037	1.28	0.114	1.24	0.111	2.93	0.262	1.07
141	Overfl	H94	M	1	10	2.3	54	5.4	3.99	0.38	0.038	0.25	0.025	0.07	0.007	-2.6	5.7	0.57	1.74	20	2	3	0.69	0.069	0.52	0.052	0.29	0.029	1.51	0.151	0.41	4.19	0.419	1.43	2.6	0.26	0.96	9	0.9	2.2	0.29	0.029	0.75	0.075	0.67	0.067	1.72	0.172	0.54
142	Overfl	H94	M	1	9.5	2.25	58.5	6.158	4.07	0.36	0.038	0.25	0.026	0.07	0.007	-2.65	4.1	0.432	1.41	19	2	2.94	0.59	0.062	0.57	0.06	0.29	0.031	1.46	0.153	0.38	2.64	0.278	0.97	2.4	0.253	0.88	8	0.842	2.08	0.23	0.024	0.7	0.074	0.65	0.069	1.59	0.167	0.46
143	Overfl	H94	M	1	9.2	2.22	47	5.109	3.85	0.34	0.037	0.22	0.024	0.06	0.006	-2.84	4.3	0.467	1.46	17	1.848	2.83	0.65	0.071	0.49	0.053	0.28	0.03	1.42	0.155	0.35	2.88	0.313	1.06	2.3	0.25	0.83	7	0.761	1.95	0.23	0.025	0.72	0.078	0.61	0.066	1.55	0.169	0.44
144	Overfl	H94	M	1	7	1.95	30.5	4.357	3.42	0.28	0.04	0.2	0.029	0.04	0.006	-3.12	3.2	0.457	1.16	14	2	2.64	0.49	0.07	0.36	0.051	0.25	0.035	1.1	0.157	0.09	2.1	0.3	0.74	1.8	0.257	0.59	5	0.714	1.61	0.21	0.03	0.49	0.07	0.44	0.063	1.15	0.164	0.14
145	Overfl	H94	M	1	10	2.3	60	6	4.09	0.4	0.04	0.26	0.026	0.08	0.008	-2.51	4.8	0.48	1.57	21	2.1	3.04	0.7	0.07	0.49	0.049	0.33	0.033	1.52	0.152	0.42	3.28	0.328	1.19	2.7	0.27	0.99	9	0.9	2.2	0.25	0.025	0.77	0.077	0.74	0.074	1.75	0.175	0.56
146	Overfl	H94	M	1	10.5	2.35	51	4.857	3.93	0.41	0.039	0.26	0.025	0.08	0.008	-2.48	5.2	0.495	1.65	23	2.19	3.14	0.79	0.075	0.52	0.05	0.33	0.031	1.64	0.156	0.49	3.56	0.339	1.27	2.8	0.267	1.03	9	0.857	2.2	0.28	0.026	0.83	0.079	0.75	0.072	1.87	0.178	0.62
147	Overfl	H94	F	0	11.5	2.44	66.5	5.783	4.2	0.44	0.038	0.32	0.028	0.11	0.01	-2.2	5.4	0.47	1.69	22	1.913	3.09	0.7	0.061	0.57	0.05	0.54	0.047	1.82	0.158	0.6	3.58	0.312	1.28	2.9	0.252	1.06	10	0.87	2.3	0.29	0.026	0.82	0.071	0.67	0.058	1.78	0.155	0.58
148	Overfl	H94	F	0	8.4	2.13	50	5.952	3.91	0.35	0.042	0.23	0.027	0.06	0.008	-2.76	3.7	0.44	1.31	17	2.024	2.83	0.59	0.07	0.41	0.049	0.25	0.029	1.24	0.148	0.22	2.46	0.292	0.9	1.8	0.214	0.59	7	0.833	1.95	0.2	0.023	0.52	0.062	0.46	0.055	1.18	0.14	0.16
149	Overfl	H94	F	0	9.2	2.22	43.5	4.728	3.77	0.38	0.041	0.23	0.025	0.07	0.007	-2.68	3.9	0.424	1.36	16	1.739	2.77	0.64	0.069	0.47	0.052	0.28	0.03	1.39	0.151	0.33	2.51	0.273	0.92	2.2	0.239	0.79	6	0.652	1.79	0.23	0.025	0.59	0.064	0.56	0.06	1.37	0.149	0.32
150	Overfl	H94	F	0	8.6	2.15	43.5	5.058	3.77	0.33	0.038	0.21	0.024	0.05	0.006	-2.91	4	0.465	1.39	18	2.093	2.89	0.62	0.072	0.44	0.051	0.29	0.034	1.36	0.158	0.31	2.64	0.307	0.97	2	0.233	0.69	6	0.698	1.79	0.23	0.027	0.54	0.063	0.51	0.059	1.28	0.148	0.24
151	Overfl	H94	F	0	8.6	2.15	44	5.116	3.78	0.36	0.042	0.24	0.028	0.07	0.008	-2.69	4	0.465	1.39	20	2.326	3	0.56	0.065	0.46	0.053	0.21	0.025	1.23	0.143	0.2	2.77	0.322	1.02	2.1	0.244	0.74	9	1.047	2.2	0.28	0.032	0.52	0.061	0.54	0.063	1.34	0.156	0.29
152	Overfl	H94	F	0	9.8	2.28	45.5	4.643	3.82	0.35	0.036	0.24	0.024	0.07	0.007	-2.72	3.9	0.398	1.36	15	1.531	2.71	0.61	0.062	0.44	0.045	0.25	0.025	1.29	0.132	0.26	2.61	0.266	0.96	2.2	0.224	0.79	8	0.816	2.08	0.2	0.02	0.59	0.06	0.56	0.057	1.34	0.137	0.29
153	Overfl	H94	F	0	8	2.08	43.5	5.438	3.77	0.34	0.043	0.22	0.028	0.06	0.007	-2.84	3.8	0.475	1.34	16	2	2.77	0.61	0.076	0.38	0.047	0.25	0.031	1.23	0.153	0.2	2.57	0.322	0.94	2	0.25	0.69	6	0.75	1.79	0.23	0.029	0.56	0.07	0.51	0.063	1.29	0.162	0.26
154	Overfl	H94	F	0	8.3	2.12	40.5	4.88	3.7	0.3	0.036	0.21	0.025	0.05	0.006	-3.01	3.9	0.47	1.36	18	2.169	2.89	0.56	0.067	0.46	0.055	0.33	0.039	1.34	0.162	0.29	2.56	0.308	0.94	2	0.241	0.69	6	0.723	1.79	0.18	0.022	0.59	0.071	0.51	0.061	1.28	0.154	0.24
155	Overfl	H94	F	0	8.7	2.16	55	6.322	4.01	0.38	0.044	0.24	0.028	0.07	0.008	-2.64	4.5	0.517	1.5	20	2.299	3	0.62	0.071	0.46	0.053	0.28	0.032	1.36	0.156	0.31	3.14	0.361	1.14	2.3	0.264	0.83	9	1.034	2.2	0.18	0.021	0.61	0.07	0.54	0.062	1.33	0.152	0.28
156	Overfl	H94	F	0	8.4	2.13	50.5	6.012	3.92	0.38	0.045	0.25	0.03	0.07	0.009	-2.6	4.1	0.488	1.41	19	2.262	2.94	0.59	0.07	0.43	0.051	0.31	0.037	1.33	0.158	0.28	2.77	0.33	1.02	1.9	0.226	0.64	7	0.833	1.95	0.21	0.025	0.57	0.068	0.54	0.064	1.33	0.158	0.28
157	Overfl	H94	F	0	11.8	2.47	53.5	4.534	3.98	0.44	0.037	0.31	0.026	0.11	0.009	-2.23	5.4	0.458	1.69	23	1.949	3.14	0.69	0.058	0.57	0.049	0.36	0.031	1.62	0.137	0.48	3.78	0.32	1.33	2.6	0.22	0.96	10	0.847	2.3	0.28	0.024	0.79	0.067	0.67	0.057	1.73	0.147	0.55
158	Overfl	H94	F	0	11.4	2.43	65	5.702	4.17	0.49	0.043	0.33	0.029	0.13	0.011	-2.06	5.7	0.5	1.74	22	1.93	3.09	0.69	0.06	0.57	0.05	0.39	0.034	1.65	0.145	0.5	4.05	0.355	1.4	2.7	0.237	0.99	7	0.614	1.95	0.26	0.023	0.79	0.069	0.67	0.059	1.72	0.151	0.54
159	Overfl	VS95	M	1	11.3	2.42	54	4.779	3.99	0.43	0.038	0.28	0.025	0.09	0.008	-2.36	5.8	0.513	1.76	21	1.858	3.04	0.69	0.061	0.64	0.056	0.41	0.036	1.73	0.154	0.55	4.07	0.36	1.4	3.8	0.336	1.34	9	0.796	2.2	0.34	0.03	1.01	0.09	0.98	0.087	2.34	0.207	0.85
160	Overfl	VS95	M	1	12.7	2.54	62.5	4.921	4.14	0.45	0.035	0.26	0.02	0.09	0.007	-2.39	6.3	0.496	1.84	23	1.811	3.14	0.87	0.068	0.74	0.058	0.34	0.027	1.95	0.153	0.67	4.35	0.343	1.47	3.7	0.291	1.31	9	0.709	2.2	0.34	0.027	1.05	0.082	1.03	0.081	2.42	0.191	0.88
161	Overfl	VS95	M	1	11.5	2.44	57.5	5	4.05	0.44	0.038	0.27	0.023	0.09	0.008	-2.37	5.4	0.47	1.69	21	1.826	3.04	0.7	0.061	0.57	0.05	0.38	0.033	1.65	0.144	0.5	3.75	0.326	1.32	3.6	0.313	1.28	11	0.957	2.4	0.33	0.028	1.03	0.09	0.93	0.081	2.29	0.199	0.83
162	Overfl	VS95	M	1	12.6	2.53	58	4.603	4.06	0.43	0.034	0.29	0.023	0.1	0.008	-2.32	6.1	0.484	1.81	23	1.825	3.14	0.67	0.053	0.82	0.065	0.41	0.032	1.9	0.151	0.64	4.2	0.333	1.44	3.8	0.302	1.34	10	0.794	2.3	0.16	0.013	1	0.079	1.01	0.081	2.18	0.173	0.78
163	Overfl	VS95	M	1	11.7	2.46	51	4.359	3.93	0.4	0.034	0.27	0.023	0.08	0.007	-2.47	5	0.427	1.61	21	1.795	3.04	0.69	0.059	0.57	0.049	0.28	0.024	1.54	0.131	0.43	3.46	0.296	1.24	3.2	0.274	1.16	10	0.855	2.3	0.33	0.028	0.93	0.08	0.88	0.076	2.14	0.183	0.76
164	Overfl	VS95	M	1	12.8	2.55	59	4.609	4.08	0.39	0.03	0.26	0.02	0.08	0.006	-2.53	5.4	0.422	1.69	21	1.641	3.04	0.74	0.058	0.57	0.045	0.34	0.027	1.65	0.129	0.5	3.75	0.293	1.32	3.5	0.273	1.25	11	0.859	2.4	0.23	0.018	0.9	0.07	0.9	0.07	2.03	0.159	0.71
165	Overfl	VS95	M	1	13.8	2.62	68.5	4.964	4.23	0.52	0.038	0.32	0.023	0.13	0.009	-2.04	6.5	0.471	1.87	25	1.812	3.22	0.85	0.062	0.79	0.057	0.47	0.034	2.11	0.153	0.75	4.39	0.318	1.48	4.4	0.319	1.48	12	0.87	2.48	0.31	0.023	1.21	0.088	1.1	0.079	2.62	0.19	0.96
166	Overfl	VS95	M	1	12.8	2.55	62.5	4.883	4.14	0.47	0.037	0.28	0.022	0.1	0.008	-2.27	6.5	0.508	1.87	24	1.875	3.18	0.74	0.058	0.67	0.052	0.43	0.033	1.83	0.143	0.61	4.67	0.365	1.54	3.9	0.305	1.36	11	0.859	2.4	0.28	0.022	1.08	0.084	1.05	0.082	2.41	0.188	0.88
167	Overfl	VS95	M	1	12.5	2.53	64.5	5.16	4.17	0.45	0.036	0.28	0.022	0.1	0.008	-2.31	6	0.48	1.79	24	1.92	3.18	0.69	0.055	0.59	0.047	0.41	0.033	1.69	0.135	0.52	4.31	0.345	1.46	4	0.32	1.39	11	0.88	2.4	0.38	0.03	1.11	0.089	1.06	0.085	2.55	0.204	0.94
168	Overfl	VS95	M	1	12.9	2.56	61.5	4.767	4.12	0.47	0.036	0.3	0.023	0.11	0.009	-2.2	6.4	0.496	1.86	24	1.86	3.18	0.79	0.061	0.7	0.055	0.39	0.03	1.88	0.146	0.63	4.52	0.35	1.51	4	0.31	1.39	11	0.853	2.4	0.39	0.03	1.19	0.093	1.06	0.082	2.65	0.206	0.98
169	Overfl	VS95	M	1	9.1	2.21	51	5.604	3.93	0.37	0.041	0.26	0.029	0.08	0.008	-2.58	4.2	0.462	1.44	18	1.978	2.89	0.51	0.056	0.49	0.054	0.29	0.032	1.29	0.142	0.26	2.91	0.319	1.07	2.4	0.264	0.88	9	0.989	2.2			0.65	0.072	0.59	0.065
170	Overfl	VS95	M	1	12.4	2.52	58.5	4.718	4.07	0.42	0.034	0.31	0.025	0.1	0.008	-2.28	5.9	0.476	1.77	24	1.935	3.18	0.8	0.065	0.62	0.05	0.28	0.022	1.7	0.137	0.53	4.2	0.339	1.43	3.9	0.315	1.36	11	0.887	2.4	0.34	0.028	1.11	0.09	1.06	0.086	2.52	0.203	0.92
171	Overfl	VS95	F	0	11.9	2.48	47.5	3.992	3.86	0.4	0.034	0.28	0.024	0.09	0.007	-2.43	4.9	0.412	1.59	19	1.597	2.94	0.77	0.065	0.52	0.044	0.36	0.03	1.65	0.139	0.5	3.25	0.273	1.18	2.6	0.218	0.96	8	0.672	2.08	0.33	0.028	0.72	0.061	0.62	0.052	1.67	0.14	0.51
172	Overfl	VS95	F	0	11.5	2.44	56.5	4.913	4.03	0.41	0.036	0.29	0.025	0.09	0.008	-2.37	4.7	0.409	1.55	20	1.739	3	0.69	0.06	0.49	0.043	0.33	0.028	1.51	0.131	0.41	3.19	0.278	1.16	2.4	0.209	0.88	8	0.696	2.08	0.26	0.023	0.7	0.061	0.65	0.057	1.62	0.141	0.48
173	Overfl	VS95	F	0	11.7	2.46	55	4.701	4.01	0.43	0.037	0.31	0.026	0.1	0.009	-2.26	5.3	0.453	1.67	19	1.624	2.94	0.69	0.059	0.52	0.045	0.36	0.031	1.57	0.134	0.45	3.73	0.319	1.32	2.7	0.231	0.99	8	0.684	2.08	0.23	0.02	0.74	0.063	0.67	0.057	1.64	0.14	0.49
174	Overfl	VS95	F	0	14.2	2.65	68	4.789	4.22	0.5	0.035	0.34	0.024	0.13	0.009	-2.01	5.8	0.408	1.76	24	1.69	3.18	0.74	0.052	0.67	0.047	0.38	0.027	1.78	0.126	0.58	4.02	0.283	1.39	3.2	0.225	1.16	8	0.563	2.08	0.23	0.016	0.9	0.063	0.83	0.059	1.96	0.138	0.67
175	Overfl	VS95	F	0	9.5	2.25	27.5	2.895	3.31	0.44	0.046	0.28	0.029	0.1	0.01	-2.34	4.3	0.453	1.46	19	2	2.94	0.65	0.069	0.44	0.047	0.26	0.028	1.36	0.143	0.31	2.94	0.31	1.08	2	0.211	0.69	7	0.737	1.95	0.15	0.016	0.54	0.057	0.31	0.033	1	0.105	0
176	Overfl	VS95	F	0	11.4	2.43	63	5.526	4.14	0.44	0.039	0.29	0.025	0.1	0.009	-2.3	4.8	0.421	1.57	18	1.579	2.89	0.57	0.05	0.52	0.046	0.28	0.024	1.37	0.121	0.32	3.43	0.3	1.23	2.3	0.202	0.83	8	0.702	2.08	0.2	0.017	0.7	0.062	0.59	0.052	1.49	0.131	0.4
177	Overfl	VS95	F	0	10.3	2.33	51.5	5	3.94	0.38	0.037	0.25	0.024	0.07	0.007	-2.6	4.7	0.456	1.55	20	1.942	3	0.72	0.07	0.52	0.051	0.29	0.029	1.54	0.149	0.43	3.16	0.307	1.15	2.3	0.223	0.83	7	0.68	1.95	0.2	0.019	0.65	0.064	0.57	0.056	1.42	0.138	0.35
178	Overfl	VS95	F	0	13.2	2.58	52	3.939	3.95	0.48	0.036	0.29	0.022	0.11	0.008	-2.21	6.4	0.485	1.86	25	1.894	3.22	0.82	0.062	0.64	0.048	0.39	0.03	1.85	0.14	0.61	4.55	0.345	1.52	3.4	0.258	1.22	9	0.682	2.2	0.33	0.025	0.92	0.069	0.82	0.062	2.06	0.156	0.72
179	Overfl	VS95	F	0	11.9	2.48	56	4.706	4.03	0.42	0.035	0.32	0.027	0.11	0.009	-2.25	5.4	0.454	1.69	23	1.933	3.14	0.64	0.054	0.57	0.048	0.34	0.029	1.55	0.131	0.44	3.85	0.323	1.35	2.9	0.244	1.06	8	0.672	2.08	0.28	0.023	0.79	0.066	0.7	0.059	1.77	0.149	0.57
180	Overfl	VS95	F	0	10.8	2.38	56	5.185	4.03	0.43	0.04	0.25	0.023	0.08	0.008	-2.47	4.4	0.407	1.48	20	1.852	3	0.93	0.086	0.51	0.047	0.29	0.027	1.73	0.161	0.55	2.67	0.247	0.98	2.3	0.213	0.83	9	0.833	2.2	0.25	0.023	0.7	0.065	0.59	0.055	1.54	0.142	0.43
181	Overfl	VS95	F	0	11.3	2.42	63	5.575	4.14	0.46	0.041	0.3	0.027	0.11	0.01	-2.22	5.2	0.46	1.65	23	2.035	3.14	0.67	0.059	0.52	0.046	0.31	0.028	1.51	0.133	0.41	3.69	0.327	1.31	2.9	0.257	1.06	8	0.708	2.08	0.29	0.026	0.79	0.07	0.67	0.059	1.75	0.155	0.56
182	Overfl	VS95	F	0	10.5	2.35	52.5	5	3.96	0.39	0.037	0.28	0.027	0.09	0.008	-2.46	4.8	0.457	1.57	22	2.095	3.09	0.74	0.07	0.54	0.051	0.33	0.031	1.6	0.153	0.47	3.2	0.304	1.16	2.5	0.238	0.92	8	0.762	2.08	0.28	0.026	0.65	0.062	0.65	0.062	1.59	0.151	0.46
[truncated: 3 more columns]

## Sheet: DataOmVsOarFjernetObs175FraLau
nr	sted	ses	kj	kr	oar	OmUlv	OmLau	OmCave
3	Ulven	H94	M	9.2	0.05	40.5
5	Ulven	H94	M	8.3	0.05	46.5
7	Ulven	H94	M	7.1	0.04	36.5
10	Ulven	H94	M	8.9	0.05	49
12	Ulven	H94	M	8.6	0.06	42.5
13	Ulven	H94	M	8	0.06	40.5
14	Ulven	H94	M	7	0.04	33.5
15	Ulven	H94	M	6.9	0.04	30.5
16	Ulven	H94	M	8.8	0.06	36.5
17	Ulven	H94	M	9.5	0.06	37.5
18	Ulven	H94	F	7.8	0.05	39.5
20	Ulven	H94	F	7.6	0.05	33
22	Ulven	H94	F	8.8	0.06	42
24	Ulven	H94	F	8.4	0.06	36
27	Ulven	H94	F	7.4	0.05	36
28	Ulven	H94	F	7.7	0.06	43
29	Ulven	H94	M	9	0.06	40
30	Ulven	H94	F	8.9	0.06	37.5
31	Ulven	H94	F	8.4	0.05	36.5
32	Ulven	H94	M	6.5	0.04	30
34	Ulven	H94	F	6.9	0.04	35
36	Ulven	H94	F	7.4	0.05	38
37	Ulven	H94	F	8	0.05	35.5
38	Ulven	H94	F	7	0.05	39.5
39	Ulven	VS95	M	14.2	0.09	51
41	Ulven	VS95	F	13.2	0.09	47
42	Ulven	VS95	M	14.9	0.11	53.5
43	Ulven	VS95	F	11	0.08	46.5
44	Ulven	VS95	M	13.8	0.08	50.5
45	Ulven	VS95	M	14	0.1	51
46	Ulven	VS95	F	10.8	0.08	50.5
47	Ulven	VS95	M	15	0.08	53
48	Ulven	VS95	F	12.2	0.09	48
49	Ulven	VS95	M	14.1	0.09	51.5
50	Ulven	VS95	F	12	0.08	47.5
52	Ulven	VS95	M	14.6	0.1	56.5
53	Ulven	VS95	M	13.8	0.09	51
54	Ulven	VS95	F	12.4	0.08	46.5
55	Ulven	VS95	M	14.1	0.1	56
56	Ulven	VS95	F	11.7	0.08	47.5
57	Ulven	VS95	M	11.5	0.07	53.5
58	Ulven	VS95	M	13	0.1	41.5
59	Ulven	VS95	M	12.4	0.07	45
60	Ulven	VS95	F	13.3	0.1	57
61	Ulven	VS95	F	10.2	0.09	54
62	Ulven	VS95	F	13.4	0.1	56
63	Ulven	VS95	F	12.3	0.1	53
64	Ulven	VS95	F	11.2	0.08	44.5
65	Grotte	H94	M	21	0.13			53.5
66	Grotte	H94	M	19	0.12			53
67	Grotte	H94	M	15.5	0.09			42
68	Grotte	H94	M	17.4	0.12			55
69	Grotte	H94	M	15.7	0.08			35.5
70	Grotte	H94	M	14.2	0.09			43
71	Grotte	H94	M	18	0.11			40
72	Grotte	H94	M	18.3	0.11			43
73	Grotte	H94	M	17.7	0.09			49
74	Grotte	H94	M	20.3	0.11			48
75	Grotte	H94	M	12.5	0.06			40
76	Grotte	H94	F	18.8	0.12			43.5
77	Grotte	H94	F	11.3	0.05			28.5
78	Grotte	H94	F	13.3	0.09			49
79	Grotte	H94	F	15.6	0.1			47.5
80	Grotte	H94	F	16.8	0.11			43.5
81	Grotte	H94	F	16.3	0.09			50
82	Grotte	H94	F	17.2	0.11			41
83	Grotte	H94	F	15.9	0.1			43
84	Grotte	H94	F	14.1	0.09			46.5
85	Grotte	H94	F	14.3	0.09			40
86	Grotte	H94	F	15.7	0.09			35.5
87	Grotte	VS95	M	16.9	0.09			49
88	Grotte	VS95	M	14.8	0.08			42
89	Grotte	VS95	M	20.7	0.11			46
90	Grotte	VS95	M	19.7	0.1			38.5
91	Grotte	VS95	M	17.9	0.1			36
92	Grotte	VS95	M	15	0.09			42.5
93	Grotte	VS95	M	20.9	0.1			36
94	Grotte	VS95	M	18.4	0.1			41.5
95	Grotte	VS95	M	19.1	0.1			44
96	Grotte	VS95	M	18	0.1			58
97	Grotte	VS95	M	11.8	0.06			32
98	Grotte	VS95	M	11	0.04			27.5
99	Grotte	VS95	F	15.2	0.08			44.5
100	Grotte	VS95	F	15.5	0.08			44
101	Grotte	VS95	F	8.9	0.04			36
102	Grotte	VS95	F	15.9	0.08			37.5
103	Grotte	VS95	F	16.8	0.1			50
104	Grotte	VS95	F	15.7	0.1			43.5
105	Grotte	VS95	F	18.7	0.1			46
106	Grotte	VS95	F	15.2	0.07			38
107	Grotte	VS95	F	16.4	0.08			38
108	Grotte	VS95	F	9.4	0.05			34.5
109	Grotte	VS95	F	13.9	0.06			39
110	Grotte	VS95	F	11.6	0.06			32.5
135	Overfl	H94	M	15.1	0.13		66
136	Overfl	H94	M	9	0.08		51
137	Overfl	H94	M	11	0.08		49.5
138	Overfl	H94	M	10.6	0.09		64
139	Overfl	H94	M	14.1	0.14		67.5
140	Overfl	H94	M	11.2	0.12		53
141	Overfl	H94	M	10	0.07		54
142	Overfl	H94	M	9.5	0.07		58.5
143	Overfl	H94	M	9.2	0.06		47
144	Overfl	H94	M	7	0.04		30.5
145	Overfl	H94	M	10	0.08		60
146	Overfl	H94	M	10.5	0.08		51
147	Overfl	H94	F	11.5	0.11		66.5
148	Overfl	H94	F	8.4	0.06		50
149	Overfl	H94	F	9.2	0.07		43.5
150	Overfl	H94	F	8.6	0.05		43.5
151	Overfl	H94	F	8.6	0.07		44
152	Overfl	H94	F	9.8	0.07		45.5
153	Overfl	H94	F	8	0.06		43.5
154	Overfl	H94	F	8.3	0.05		40.5
155	Overfl	H94	F	8.7	0.07		55
156	Overfl	H94	F	8.4	0.07		50.5
157	Overfl	H94	F	11.8	0.11		53.5
158	Overfl	H94	F	11.4	0.13		65
159	Overfl	VS95	M	11.3	0.09		54
160	Overfl	VS95	M	12.7	0.09		62.5
161	Overfl	VS95	M	11.5	0.09		57.5
162	Overfl	VS95	M	12.6	0.1		58
163	Overfl	VS95	M	11.7	0.08		51
164	Overfl	VS95	M	12.8	0.08		59
165	Overfl	VS95	M	13.8	0.13		68.5
166	Overfl	VS95	M	12.8	0.1		62.5
167	Overfl	VS95	M	12.5	0.1		64.5
168	Overfl	VS95	M	12.9	0.11		61.5
169	Overfl	VS95	M	9.1	0.08		51
170	Overfl	VS95	M	12.4	0.1		58.5
171	Overfl	VS95	F	11.9	0.09		47.5
172	Overfl	VS95	F	11.5	0.09		56.5
173	Overfl	VS95	F	11.7	0.1		55
174	Overfl	VS95	F	14.2	0.13		68
176	Overfl	VS95	F	11.4	0.1		63
177	Overfl	VS95	F	10.3	0.07		51.5
178	Overfl	VS95	F	13.2	0.11		52
179	Overfl	VS95	F	11.9	0.11		56
180	Overfl	VS95	F	10.8	0.08		56
181	Overfl	VS95	F	11.3	0.11		63
182	Overfl	VS95	F	10.5	0.09		52.5
